# Supplementary material for: Heterogeneity in transmissibility and shedding SARS-CoV-2 via droplets and aerosols
Source: bioRxiv or medRxiv preprint supplement (doi:10.1101/2020.10.13.20212233), 2020-12-02
Supplement: Supplementary file [file media-1.pdf]

1  
2  
3  
4  
5  
6  
7  
8  
9

Supplementary Materials for  
**Heterogeneity in transmissibility and shedding**  
**SARS-CoV-2 via droplets and aerosols**

Paul Z. Chen, Niklas Bobrovitz, Zahra Premji,  
Marion Koopmans, David N. Fisman, Frank X. Gu.

## 10 **Materials and Methods**

### 11 Search strategy, selection criteria and data collection

12 We undertook a systematic review and prospectively submitted the protocol for registration  
13 on PROSPERO (registration number, CRD42020204637). Other than the title of this study, we  
14 have followed PRISMA reporting guidelines (39). The systematic review was conducted  
15 according to Cochrane methods guidance (40).

16 The search included papers that (i) reported positive, quantitative measurements (copies/ml  
17 or an equivalent metric) of SARS-CoV-2, SARS-CoV-1 or A(H1N1)pdm09 in human  
18 respiratory specimens (ETA, NPA, NPS, OPS, POS and Spu) from COVID-19, SARS or  
19 A(H1N1)pdm09 cases; (ii) reported data that could be extracted from the infectious periods of  
20 SARS-CoV-2 (defined as -3 to +10 DFSO for symptomatic cases and 0 to +10 days from the day  
21 of laboratory diagnosis for asymptomatic cases), SARS-CoV-1 (defined as 0 to +20 DFSO or the  
22 equivalent asymptomatic period) or A(H1N1)pdm09 (defined as -2 to +9 DFSO for symptomatic  
23 cases and 0 days to +9 days from the day of laboratory diagnosis for asymptomatic cases); and  
24 (iii) reported data for two or more cases with laboratory-confirmed COVID-19, SARS or  
25 A(H1N1)pdm09 based on World Health Organization (WHO) case definitions. Quantitative  
26 specimen measurements were considered after RNA extraction for diagnostic sequences of  
27 SARS-CoV-2 (*Ofr1b*, *N*, *RdRp* and *E* genes), SARS-CoV-1 (*Ofr1b*, *N* and *RdRp* genes) and  
28 A(H1N1)pdm09 (*HA* and *M* genes).

29 Studies were excluded, in the following order, if they (i) studied an ineligible disease; (ii)  
30 had an ineligible study design, including those that were reviews of evidence (e.g., scoping,  
31 systematic or narrative), did not include primary clinical human data, reported data for less than  
32 two cases due to an increased risk of selection bias, were incomplete (e.g., ongoing clinical

33 trials), did not report an RNA extraction step before measurement or were studies of  
34 environmental samples; (iii) reported an ineligible metric for specimen concentration (e.g.,  
35 qualitative RT-PCR or cycle threshold [Ct] values without calibration included in the study); (iv)  
36 reported quantitative measurements from an ineligible specimen type (e.g., blood specimens,  
37 pooled specimens or self-collected POS or Spu patient specimens in the absence of a healthcare  
38 professional); (v) reported an ineligible sampling period (consisted entirely of data that could not  
39 be extracted from within the infectious period); or (vi) were duplicates of an included study (e.g.,  
40 preprinted version of a published paper or duplicates not identified by Covidence). We included  
41 data from control groups receiving standard of care in interventional studies but excluded data  
42 from the intervention group. Patients in the intervention group are, by definition, systematically  
43 different from general case populations because they receive therapies not being widely used for  
44 treatment, which may influence virus concentrations. Interventional studies examining the  
45 comparative effectiveness of two or more treatments were excluded for the same reason. Studies  
46 exclusively reporting semiquantitative measurements (e.g., Ct values) of specimen concentration  
47 were excluded, as these measurements are sensitive to batch and instrument inconsistencies and,  
48 without proper calibration, cannot be compared on an absolute scale across studies (36).

49 We searched, without the use of filters or language restrictions, the following sources:  
50 MEDLINE (via Ovid, 1946 to 7 August 2020), EMBASE (via Ovid, 1974 to 7 August 2020,  
51 Cochrane Central Register of Controlled Trials (via Ovid, 1991 to 7 August 2020), Web of  
52 Science Core Collection (including: Science Citation Index Expanded, 1900 to 7 August 2020;  
53 Social Sciences Citation Index, 1900 to 7 August 2020; Arts & Humanities Citation Index, 1975  
54 to 7 August 2020; Conference Proceedings Citation Index - Science, 1990 to 7 August 2020;  
55 Conference Proceedings Citation Index - Social Sciences & Humanities, 1990 to 7 August 2020;

56 and Emerging Sources Citation Index, 2015 to 7 August 2020), as well as medRxiv and bioRxiv  
57 (both searched through Google Scholar via the Publish or Perish program, to 7 August 2020).  
58 We also gathered studies by searching through the reference lists of review articles identified by  
59 the database search, by searching through the reference lists of included articles, through expert  
60 recommendation (by Epic J. Topol, Akiko Iwasaki and A. Marm Kilpatrick on Twitter) and by  
61 hand-searching through journals (*Nature*, *Nat. Med.*, *Science*, *NEJM*, *Lancet*, *Lancet Infect. Dis.*,  
62 *JAMA*, *JAMA Intern. Med.* and *BMJ*). A comprehensive search was developed by a librarian,  
63 which included subject headings and keywords. The search strategy had 3 main concepts  
64 (disease, specimen type and outcome), and each concept was combined using the appropriate  
65 Boolean operators. The search was tested against a sample set of known articles that were pre-  
66 identified. The line-by-line search strategies for all databases are included in Tables S1 to S5.  
67 The search results were exported from each database and uploaded to the Covidence online  
68 system for deduplication and screening.

69 Two authors independently screened titles and abstracts, reviewed full texts, collected data  
70 and assessed risk of bias via Covidence and a hybrid critical appraisal checklist based on the  
71 Joanna Briggs Institute (JBI) tools for case series, analytical cross-sectional studies and  
72 prevalence studies (41-43). To evaluate the sample size in a study, we used the following  
73 calculation:

74

$$75 \quad n^* = \frac{z^2 \sigma}{d^2}, \quad (1)$$

76

77 where  $n^*$  is the sample size threshold,  $z$  is the z-score for the level of confidence (95%),  $\sigma$  is the  
78 standard deviation (assumed to be  $3 \log_{10}$  copies/ml, one quarter of the full range of rVLS) and  $d$

79 is the marginal error (assumed to be 1 log<sub>10</sub> copies/ml, based on the minimum detection limit for  
80 qRT-PCR across studies) (44). The hybrid JBI critical appraisal checklist is shown in Table S10.  
81 Studies were considered to have low risk of bias if they met the majority of the items, indicating  
82 that the estimates were likely to be correct for the target population. Inconsistencies were  
83 resolved by discussion and consensus.

84 The search found 28 studies for COVID-19 (21, 38, 45-70), 8 studies for SARS (71-78) and  
85 27 studies for A(H1N1)pdm09 (79-105), and data were collected from each study. Descriptive  
86 statistics on quantitative specimen measurements were collected from confirmed cases directly if  
87 reported numerically or using WebPlotDigitizer 4.3 (<https://apps.automeris.io/wpd/>) if reported  
88 graphically. Individual specimen measurements were collected directly if reported numerically  
89 or, when the data were clearly represented, using the tool if reported graphically. We also  
90 collected the relevant numbers of cases, types of cases, pharmacotherapies, volumes of transport  
91 media, numbers of specimens and DFSO (for symptomatic cases) or day relative to initial  
92 laboratory diagnosis (for asymptomatic cases) on which each specimen was taken. Hospitalized  
93 cases were defined as those being tested in a hospital setting and then admitted. Non-admitted  
94 cases were defined as those being tested in a hospital setting but not admitted. Community cases  
95 were defined as those being tested in a community setting. Symptomatic, presymptomatic and  
96 asymptomatic infections were defined as in the study. Based on rare description in contributing  
97 studies, paucisymptomatic infections, when described, were included with symptomatic ones.  
98 Pediatric cases were defined as those below 18 years of age or as defined in the study. Adult  
99 cases were defined as those 18 years of age or higher or as defined in the study.

100

101 Calculation of rVLs from specimen measurements

102 In this study, viral concentrations in respiratory specimens were denoted as specimen  
103 measurements, whereas viral concentrations in the respiratory tract were denoted as rVLs. To  
104 determine rVLs, each collected quantitative specimen measurement was converted to rVL based  
105 on the dilution factor. For example, measurements from swabbed specimens (NPS and OPS)  
106 typically report the RNA concentration in viral transport media. Based on the expected uptake  
107 volume for swabs ( $0.128 \pm 0.031$  ml, mean  $\pm$  SD) (106) or reported collection volume for  
108 expelled fluid in the study (e.g., 0.5 to 1 ml) along with the reported volume of transport media  
109 in the study (e.g., 1 ml), we calculated the dilution factor for each respiratory specimen to  
110 estimate the rVL. If the diluent volume was not reported, then the dilution factor was calculated  
111 assuming a volume of 1 ml (NPS and OPS), 2 ml (POS and ETA) or 3 ml (NPA) of transport  
112 media (46, 48, 74). Unless dilution was reported for Spu specimens, we used the specimen  
113 measurement as the rVL (21). The non-reporting of diluent volume was noted as an element  
114 increasing risk of bias in the hybrid JBI critical appraisal checklist. Specimen measurements  
115 (based on instrumentation, calibration, procedures and reagents) are not standardized. While the  
116 above procedures (including only quantitative measurements after extraction as an inclusion  
117 criterion, considering assay detection limits and correcting for specimen dilution) have  
118 considered many of these factors, non-standardization remains an inherent limitation in the  
119 variability of specimen measurements.

120

#### 121 Meta-regression of $k$ and heterogeneity in rVL

122 To assess the relationship between  $k$  and heterogeneity in rVL, we performed a univariate  
123 meta-regression ( $\log k = a(SD) + b$ , where  $a$  is the slope for association and  $b$  is the intercept)  
124 between pooled estimates of  $k$  (based on studies describing community transmission) for

125 COVID-19 ( $k = 0.409$ ) (12-14, 107-110), SARS ( $k = 0.165$ ) (15) and A(H1N1)pdm09 ( $k =$   
126 8.155) (16, 17) and the SD of the rVLs in contributing studies. Since the negative binomial  
127 distribution, from which  $k$  is derived (15), is analogous to a compound Poisson distribution in  
128 which each random variable is  $\text{Log}(k)$ -distributed, the meta-regression was performed with  
129  $\log k$ . Since SD was the metric, we used a fixed-effects model. This analysis assumes that the SD  
130 of rVLs in each study estimates SD of rVL for the disease. Thus, for weighting in the meta-  
131 regression, we used the proportion of rVL samples from each study relative to the entire  
132 systematic dataset ( $W_i = n_i/n_{\text{total}}$ ). All calculations were performed in units of  $\log_{10}$  copies/ml.  
133 As the meta-regression used pooled estimates of  $k$  for each infection, it assumed that there was  
134 no correlated bias to  $k$  across contributing studies. The limit of detection for qRT-PCR  
135 instruments used in the included studies did not significantly affect the analysis of heterogeneity  
136 in rVL, as these limits tended to be below the values found for specimens with low virus  
137 concentrations. The meta-regression was conducted using all contributing studies and showed a  
138 weak association (Pearson's  $r = -0.27$ ). Meta-regression was also conducted using studies that  
139 had low risk of bias according to the hybrid JBI critical appraisal checklist and showed a strong  
140 association (Pearson's  $r = -0.73$ ). The regression line, its 95% CI and its Pearson correlation  
141 coefficient (Pearson's  $r$ ) were presented along with the  $P$ -value for association (meta-regression  
142 slope  $t$ -test for  $a$ ) and the effect estimate ( $a$ ) between the two variables.

143

#### 144 Meta-analysis of rVLs

145 Based on the search design and composition of contributing studies, the meta-analysis  
146 overall estimates were the expected SARS-CoV-2, SARS-CoV-1 and A(H1N1)pdm09 rVL when  
147 encountering a COVID-19, SARS or A(H1N1)pdm09 case, respectively, during their infectious

148 period. Pooled estimates and 95% CIs for the expected rVL of each virus across their infectious  
149 period were calculated using a random-effects meta-analysis (DerSimonian and Laird method).  
150 The estimates for rVL assumed that each viral copy was extracted and quantified from the tested  
151 specimen aliquot. For studies reporting summary statistics in medians and interquartile or total  
152 ranges, we derived estimates of the mean and variance and calculated the 95% CIs (111). All  
153 calculations were performed in units of  $\log_{10}$  copies/ml. Between-study heterogeneity in meta-  
154 analysis was assessed using Cochran's  $Q$  test and the  $I^2$  and  $\tau^2$  statistics. If significant between-  
155 study heterogeneity in meta-analyses was encountered, sensitivity analysis based on the risk of  
156 bias of contributing studies was performed. The meta-analyses were conducted using STATA  
157 14.2 (StataCorp LLC, College Station, Texas, USA).

158

#### 159 Age and symptomatology subgroup analyses of SARS-CoV-2 rVLs

160 Subgroup analyses were conducted to compare the expected rVLs of SARS-CoV-2 in adult,  
161 pediatric, symptomatic and asymptomatic COVID-19 cases, as previously defined, during the  
162 infectious period. The overall estimate for each subgroup was the expected rVL when  
163 encountering a case of that subgroup during the infectious period. Studies reporting data  
164 exclusively from a subgroup of interest were directly included in the analysis after rVL  
165 estimations. For studies in which data for these subgroups constituted only part of its dataset,  
166 rVLs from the subgroup were extracted to calculate the mean, variance and 95% CIs. All  
167 calculations were performed in units of  $\log_{10}$  copies/ml. In each analysis, we excluded studies  
168 with only a single case in the subgroup of interest. Pooled estimates and 95% CIs for each  
169 subgroup were calculated using a random-effects meta-analysis (DerSimonian and Laird  
170 method). Between-study heterogeneity was assessed using Cochran's  $Q$  test and the  $I^2$  and  $\tau^2$



171 statistics. If significant between-study heterogeneity in meta-analyses was encountered,  
172 sensitivity analysis based on the risk of bias of contributing studies was performed. For meta-  
173 analyses of pediatric and asymptomatic COVID-19 cases, contributing studies had low risk of  
174 bias, and no risk-of-bias sensitivity analyses were performed for these subgroups. The meta-  
175 analyses were conducted using STATA 14.2 (StataCorp LLC, College Station, Texas, USA).

176

### 177 Distributions of rVL

178 To analyze heterogeneity in rVLs, we pooled the entirety of individual sample data  
179 (individual sample data were rVLs that were estimated from individual specimen measurements  
180 reported as in the contributing studies rather than as descriptive statistics) in the systematic  
181 dataset by disease, COVID-19 subgroups and DFSO. For analyses of SARS-CoV-2 dynamics  
182 across disease course, we included estimated rVLs from negative qRT-PCR measurements of  
183 respiratory specimens ( $N = 4, 3, 7, 10, 13, 16, 14, 22$  and  $16$  negative specimens for  $2, 3, 4, 5, 6,$   
184  $7, 8, 9$  and  $10$  DFSO, respectively) for cases that had previously been quantitatively confirmed to  
185 have COVID-19. These rVLs were estimated based on the reported assay detection limit in the  
186 respective study. Probability plots and modified Kolmogorov–Smirnov tests were used to  
187 determine the suitability of normal, lognormal, gamma and Weibull distributions to describe the  
188 distribution of rVLs for SARS-CoV-2, SARS-CoV-1 and A(H1N1)pdm09. For each virus, the  
189 data best conformed to Weibull distributions, which is described by the probability density  
190 function

191

$$192 \quad f(v) = \frac{\alpha}{\beta} \left(\frac{v}{\beta}\right)^{\alpha-1} e^{-(v/\beta)^\alpha}, \quad (2)$$

193

194 where  $\alpha$  is the shape factor,  $\beta$  is the scale factor and  $v$  is rVL ( $v \geq 0 \log_{10}$  copies/ml). Weibull  
195 distributions were fitted on the entirety of collected individual sample data for the respective  
196 category. These fitted parameters and summary statistics were presented in Table S7. Since  
197 individual specimen measurements could not be collected from all studies, there was a small bias  
198 on the mean estimate for each fitted distribution. Thus, for the curves shown in Fig. 4, B and C,  
199 the mean of the Weibull distributions summarized in Table S7 was adjusted to be the subgroup  
200 meta-analysis estimate for correction; the SD and distribution around that mean remained  
201 consistent.

202 For each Weibull distribution, the value of the rVL at the  $x^{\text{th}}$  percentile was determined  
203 using the quantile function,

204

$$205 \quad v_x = \beta[-\ln(1 - x)]^{1/\alpha}. \quad (3)$$

206

207 For cp curves, we used eq. (3) to determine rVLs from the 1<sup>st</sup> cp to the 99<sup>th</sup> cp (step size, 1%).  
208 Curve fitting to eq. (2) and calculation of eq. (3) and its 95% CI was performed using the  
209 Distribution Fitter application in Matlab R2019b (MathWorks, Inc., Natick, Massachusetts,  
210 USA).

211

212 Viral kinetics

213 To model SARS-CoV-2 kinetics during respiratory infection, we used a mechanistic  
214 epithelial cell-limited model for the respiratory tract (112), based on the system of differential  
215 equations:

216

217 
$$\frac{dT}{dt} = -\beta TV \quad (4)$$

218 
$$\frac{dI}{dt} = \beta TV - \delta I \quad (5)$$

219 
$$\frac{dV}{dt} = pI - cV, \quad (6)$$

220

221 where  $T$  is the number of uninfected target cells,  $I$  is the number of productively infected cells,  $V$   
 222 is the rVL,  $\beta$  is the infection rate constant,  $p$  is the rate at which airway epithelial cells shed virus  
 223 to the extracellular fluid,  $c$  is the clearance rate of virus and  $\delta$  is the clearance rate of  
 224 productively infected cells. Parameter units are summarized in Table S8. Using these parameters,  
 225 the viral half-life in the respiratory tract ( $t_{1/2} = \ln 2/c$ ) and the half-life of productively infected  
 226 cells ( $t_{1/2} = \ln 2/\delta$ ) could be estimated. Moreover, the cellular basic reproductive number (the  
 227 expected number of secondary infected cells from a single productively infected cell placed in a  
 228 population of susceptible cells) was calculated by

229

230 
$$R_{0,c} = \frac{p\beta T_0}{c\delta}, \quad (7)$$

231

232 where  $T_0$  is the initial number of susceptible cells (112).

233 For initial parameterization, eqs. (4)-(6) were simplified according to a quasi-steady state  
 234 approximation (113) to

235

236 
$$\frac{dT}{dt} = -\beta TV \quad (8)$$

237 
$$\frac{dV}{dt} = rTV - \delta V, \tag{9}$$

238

239 where  $r = p\beta/c$ , for a form with greater numerical stability. The system of differential equations  
240 was fitted on the mean estimates of SARS-CoV-2 rVL between -2 and 10 DFSO using the  
241 entirety of individual sample data in units of copies/ml. Numerical analysis was implemented  
242 using the Fit ODE app in OriginPro 2019b (OriginLab Corporation, Northampton,  
243 Massachusetts, USA) via the Runge-Kutta method and initial parameters  $V_0$ ,  $I_0$  and  $T_0$  of 4  
244 copies/ml, 0 cells and  $5 \times 10^7$  cells, respectively, for the range -5 to 10 DFSO. The analysis was  
245 first performed with eqs. (8)-(9). These output parameters were then used to initialize final  
246 analysis using eqs. (4)-(6), where the estimates for  $\beta$  and  $\delta$  were input as fixed and variable  
247 parameters, respectively. The fitted line and its coefficient of determination ( $r^2$ ) were presented.

248 To estimate the average incubation period, we extrapolated the kinetic model to 0 log<sub>10</sub>  
249 copies/ml pre-symptom onset. To estimate the average duration of shedding, we extrapolated the  
250 model to 0 log<sub>10</sub> copies/ml post-symptom onset. Unlike in experimental studies, this estimate for  
251 duration of shedding was not defined by assay detection limits. To estimate the average DFSO  
252 on which SARS-CoV-2 concentration reached diagnostic levels, we extrapolated the model pre-  
253 symptom onset to the equivalent of 1 and 3 log<sub>10</sub> copies/ml (chosen as example assay detection  
254 limits) in specimen concentration for NPSs immersed in 1 ml of transport media, as described by  
255 the dilution factor estimation above. The average time from respiratory infection to reach  
256 diagnostic levels was then calculated by subtracting these values from the estimated average  
257 incubation period. Notably, the extrapolated time for SARS-CoV-2 to reach diagnostic  
258 concentrations in the respiratory tract should be validated in tracing studies, in which contacts  
259 are prospectively subjected to daily sampling.

260

261 Likelihood of respiratory particles containing virions

262 To calculate an unbiased estimator for viral partitioning (the expected number of viable  
263 copies in an expelled particle at a given size), we multiplied rVLs with the volume equation for  
264 spherical particles during atomization and the estimated viability proportion, according to the  
265 following equation:

266

267 
$$\lambda = \frac{\pi\rho v_p \gamma v}{6} d^3, \quad (10)$$

268

269 where  $\lambda$  is the expectation value,  $\rho$  is the material density of the respiratory particle (997 g/m<sup>3</sup>),  
270  $v_p$  is the volumetric conversion factor (1 ml/g),  $\gamma$  is the viability proportion,  $v$  is the rVL and  $d$  is  
271 the hydrated diameter of the particle during atomization.

272 The model assumed  $\gamma$  was 0.1% as a population-level estimate. For influenza,  
273 approximately 0.1% of copies in particles expelled from the respiratory tract represent viable  
274 virus (114), which is equivalent to one in 3 log<sub>10</sub> copies/ml for rVL or, after dilution in transport  
275 media, roughly one in 4 log<sub>10</sub> copies/ml for specimen concentration. Respiratory specimens taken  
276 from influenza cases show positive cultures for specimen concentrations down to 4 log<sub>10</sub>  
277 copies/ml (115). Likewise, for COVID-19 cases, recent reports also show culture-positive  
278 respiratory specimens with SARS-CoV-2 concentrations down to 4 log<sub>10</sub> copies/ml (21),  
279 including from pediatric (66) and asymptomatic (22) cases. Our analyses indicated that SARS-  
280 CoV-2 rVLs were not different at different sites in the respiratory tract. Moreover, replication-  
281 competent SARS-CoV-2 has been found in respiratory specimens taken throughout the  
282 respiratory tract (mouth, nasopharynx, oropharynx and lower respiratory tract) (21, 58, 116).

283 Taken together, these considerations suggested that the assumption for viability proportion  
 284 (0.1%) was suitable to model the likelihood of respiratory particles containing viable SARS-  
 285 CoV-2. In accordance with the discussion above, the model did not differentiate this population-  
 286 level viability estimate based on age, symptomatology or sites of atomization. Based on the  
 287 relative relationship between the residence time of expelled particles before assessment (~5 s) in  
 288 the referenced study (114), we took the viability proportion (0.1%) to be for equilibrated  
 289 particles.

290 Likelihood profiles were determined using Poisson statistics, as described by the probability  
 291 mass function

292

$$293 \quad P(X = k) = \frac{\lambda^k e^{-\lambda}}{k!}, \quad (11)$$

294

295 where  $k$  is the number of virions partitioned within the particle. For  $\lambda$ , 95% CIs were determined  
 296 using the variance of its rVL estimate. To determine 95% CIs for likelihood profiles from the  
 297 probability mass function, we used the delta method, which specifies

298

$$299 \quad \text{Var}(g(\boldsymbol{\theta})) \approx \sigma^2 \dot{g}(\boldsymbol{\theta})' \mathbf{D} \dot{g}(\boldsymbol{\theta}), \quad (12)$$

300

301 where  $\sigma^2 \mathbf{D}$  is the covariance matrix of  $\boldsymbol{\theta}$  and  $\dot{g}(\boldsymbol{\theta})$  is the gradient of  $g(\boldsymbol{\theta})$ . For the univariate  
 302 Poisson distribution,  $\sigma^2 \mathbf{D} = \lambda$  and

303

$$304 \quad \dot{g}(\theta) = \frac{\lambda^{k-1} e^{-\lambda}}{k!} (k - \lambda). \quad (13)$$

305

306 Rate profiles of particles expelled by respiratory activities

307 Distributions from the literature were used to determine the rate profiles of particles  
308 expelled during respiratory activities. For breathing, talking and coughing, we used data from  
309 Johnson et al (117). For singing, we used data from Morawaska et al (118) for smaller aerosols  
310 ( $d_a < 20 \mu\text{m}$ ) and assumed that larger aerosols and droplets were consistent with talking based on  
311 the oral cavity mechanism from Johnson et al (117). Rate profiles (particles/min or  
312 particles/cough) were calculated based on the corrected normalized concentration ( $dC_n/d\log D_p$ ,  
313 in units of particles/cm<sup>3</sup>) at each discrete particle size, normalization (32 size channels per  
314 decade) for the aerodynamic particle sizer used, unit conversion (cm<sup>3</sup> to L) and the sample flow  
315 rate (1 L/min). For coughing, the calculation assumed that participants coughed 10 times in the  
316 30 s sampling interval. To determine the corrected normalized concentrations for breathing, we  
317 used two corrections: a particle dilution factor of 4 and evaporation diameter factor of 0.5 (117).  
318 Breathing was taken to expel negligible quantities of larger respiratory particles based on the  
319 bronchiolar fluid film burst mechanism (117). To account for intermittent breathing while talking  
320 and singing, the rate profiles for these activities included the contribution of aerosols expelled by  
321 breathing. We compared these rate profiles with those collected from talking loudly and talking  
322 quietly from Asadi et al (119). After dehydration, the particle diameter becomes approximately  
323 0.5 times the initial size from when atomized in the respiratory tract (117), and we multiplied the  
324 diameter of hydrated particles during atomization by a factor of 0.5 to calculate the dehydrated  
325 diameter. Equilibrium aerodynamic diameter was calculated by  $d_a = d_p(\rho/\rho_0)^{1/2}$ , where  $d_p$  is  
326 the dehydrated diameter,  $\rho$  is the material density of the respiratory particle (taken to be 1 g/cm<sup>3</sup>  
327 based on the composition of dehydrated respiratory particles) and  $\rho_0$  is the reference material

328 density ( $1 \text{ g/cm}^3$ ). Curves based on discrete particle measurements were connected using the  
329 nonparametric Akima spline function.

330

### 331 Shedding virions via respiratory droplets and aerosols

332 To model the respiratory shedding rate across particle size, rVL estimates and the hydrated  
333 diameters of particles expelled by a respiratory activity were input into eq. (10), and the output  
334 was then multiplied by the rate profile of the activity (talking, singing, breathing or coughing).

335 To assess the relative contribution of aerosols and droplets to mediating respiratory viral  
336 shedding for a given respiratory activity, we calculated the proportion of the cumulative hydrated  
337 volumetric rate contributed by buoyant aerosols ( $d_a \leq 10 \mu\text{m}$ ), long-range aerosols ( $10 \mu\text{m} < d_a \leq$   
338  $50 \mu\text{m}$ ), short-range aerosols ( $50 \mu\text{m} < d_a \leq 100 \mu\text{m}$ ) and droplets ( $d_a > 10 \mu\text{m}$ ) for that  
339 respiratory activity. Since the Poisson mean was proportional to cumulative volumetric rate, this  
340 estimate of the relative contribution of aerosols and droplets to respiratory viral shedding was  
341 consistent among viruses and cps in the model.

342 To determine the total respiratory shedding rate for a given respiratory activity across cp,  
343 we determined the cumulative hydrated volumetric rate (by summing the hydrated volumetric  
344 rates across particle sizes for that respiratory activity) of particle atomization and input it into eq.  
345 (10). Using rVLs and their variances as determined by the Weibull quantile functions, we then  
346 calculated the Poisson means and their 95% CIs at the different cps.

347 To assess the influence of heterogeneity in rVL on individual infectiousness, we first  
348 considered transmission of A(H1N1)pdm09 via aerosols (19). The 50% human infectious dose  
349 (HID<sub>50</sub>) of aerosolized A(H1N1)pdm09 was taken to be 1-3 virions (26). To determine the  
350 expected time required for a A(H1N1)pdm09 case to shed 1 virion via aerosols, we took the



351 reciprocal of the Poisson means and their 95% CIs at the different cps of the estimated shedding  
352 rates. The expected time required for a COVID-19 case to shed 1 virion via aerosols or 1 virion  
353 via droplets or aerosols was determined in a same manner.

354

### 355 Statistical analysis

356 For data collection, statistical analysis, coding and data visualization, we used Excel v16.40  
357 (Microsoft Corporation, Redmond, Washington, USA), OriginPro 2019b (OriginLab Corp.,  
358 Northampton, Massachusetts, USA), STATA 14.2 (StataCorp LLC, College Station, Texas,  
359 USA) and Matlab R2019b (MathWorks, Inc., Natick, Massachusetts, USA). The association  
360 between  $k$  and rVL was assessed via meta-regression, and the  $P$ -value for association was based  
361 on the meta-regression slope  $t$ -test. Between-study heterogeneity in the random-effects meta-  
362 analyses (DerSimonian and Laird method) was assessed using Cochran's  $Q$  test and the  $I^2$  and  $\tau^2$   
363 statistics ( $I^2 < 30\%$  was taken to indicate low between-study heterogeneity). If significant  
364 heterogeneity in the meta-analyses was encountered, sensitivity analysis was performed based on  
365 the risk of bias of contributing studies. Since case variance or sample size may be unequal  
366 among the viral infections or subgroups, the one-sided Welch's  $t$ -test was used to compare the  
367 difference of expected rVLs in the meta-analyses, subgroup analyses and sensitivity analyses.  
368 Probability plots for normal, lognormal, gamma and Weibull distributions of rVLs were scored  
369 based on the Blom method. Modified Kolmogorov-Smirnov tests were used to determine the  
370 goodness of fits between rVLs (in  $\log_{10}$  copies/ml) and normal, lognormal, gamma or Weibull  
371 distributions. By accepting the null hypothesis in the modified Kolmogorov-Smirnov test, the  
372 given distribution cannot be rejected to fit the data. Based on fitted Weibull distribution  
373 parameters, the Weibull quantile function was used to determine the rVL and its 95% CIs at a

374 given cp. Likelihood profiles were determined using the Poisson probability mass function and  
375 the unbiased estimator for the expected partitioning of virions at a given particle size. Variance  
376 on likelihood estimates was determined via the delta method. For all statistical analyses, the  
377 significance level ( $\alpha$ ) was taken to be 0.05.

378 **Supplementary Figures**

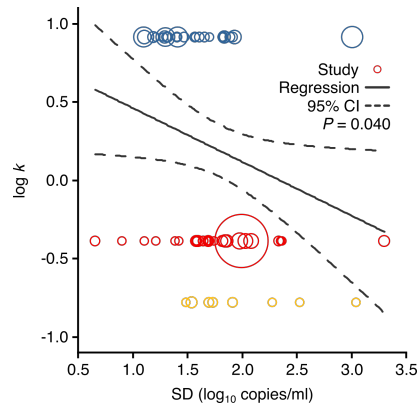

379

380 **Fig. S1. Meta-regression between dispersion in SARS-CoV-2, SARS-CoV-1 and**  
381 **A(H1N1)pdm09 transmissibility and heterogeneity in rVL.** Meta-regression of dispersion  
382 parameter ( $k$ ) with the standard deviation (SD) of respiratory viral loads (rVLs) from all  
383 contributing studies (Pearson's  $r = -0.26$ ). Pooled estimates of  $k$  were determined from the  
384 literature. Blue, red and yellow circles denote A(H1N1)pdm09 ( $N = 27$ ), COVID-19 ( $N = 28$ )  
385 and SARS ( $N = 8$ ) studies, respectively. Circle sizes denote weighting in the meta-regression.  
386 The  $P$ -value was obtained using the meta-regression slope  $t$ -test.

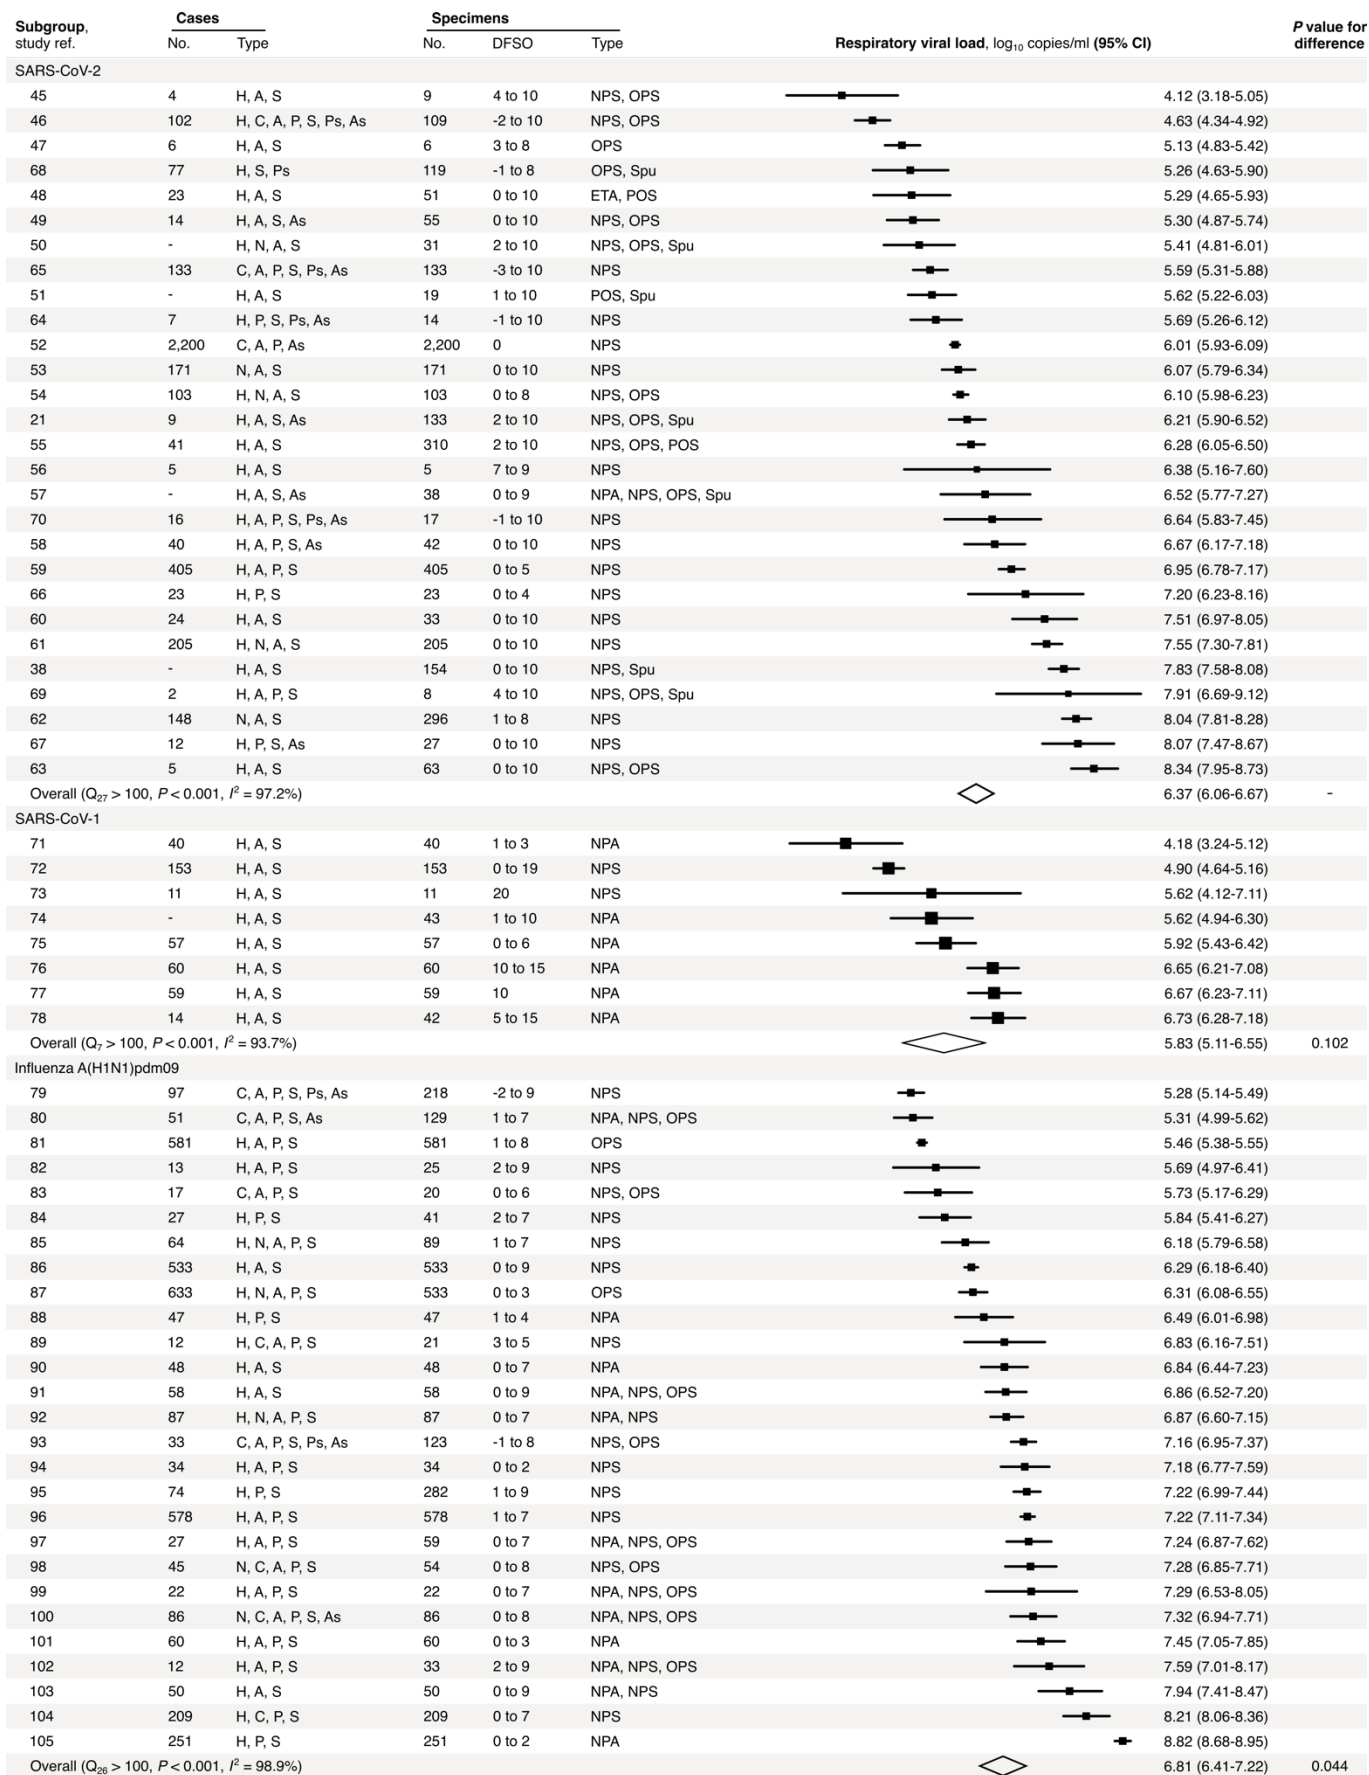

388 **Fig. S2. Meta-analysis of rVLs of SARS-CoV-2, SARS-CoV-1 and influenza**  
389 **A(H1N1)pdm09 during the infectious period.** Random-effects meta-analyses comparing the  
390 expected respiratory viral loads (rVLs) for COVID-19, SARS and A(H1N1)pdm09 cases during  
391 the infectious period. Quantitative specimen measurements were used to estimate rVLs, which  
392 refer to virus concentrations in the respiratory tract. Case types: hospitalized (H), not admitted  
393 (N), community (C), adult (A), pediatric (P), symptomatic (S), presymptomatic (Ps) and  
394 asymptomatic (As). Specimen types: endotracheal aspirate (ETA), nasopharyngeal aspirate  
395 (NPA), nasopharyngeal swab (NPS), oropharyngeal swab (OPS), posterior oropharyngeal saliva  
396 (POS) and sputum (Spu). Dashes denote case numbers that were not obtained. Box sizes denote  
397 weighting in the overall estimates. Between-study heterogeneity was assessed using the  $P$ -value  
398 from Cochran's  $Q$  test and the  $I^2$  statistic. One-sided Welch's  $t$ -tests compared the expected  
399 SARS-CoV-2 rVL with those of SARS-CoV-1 and A(H1N1)pdm09 (non-significance,  $P >$   
400 0.05).

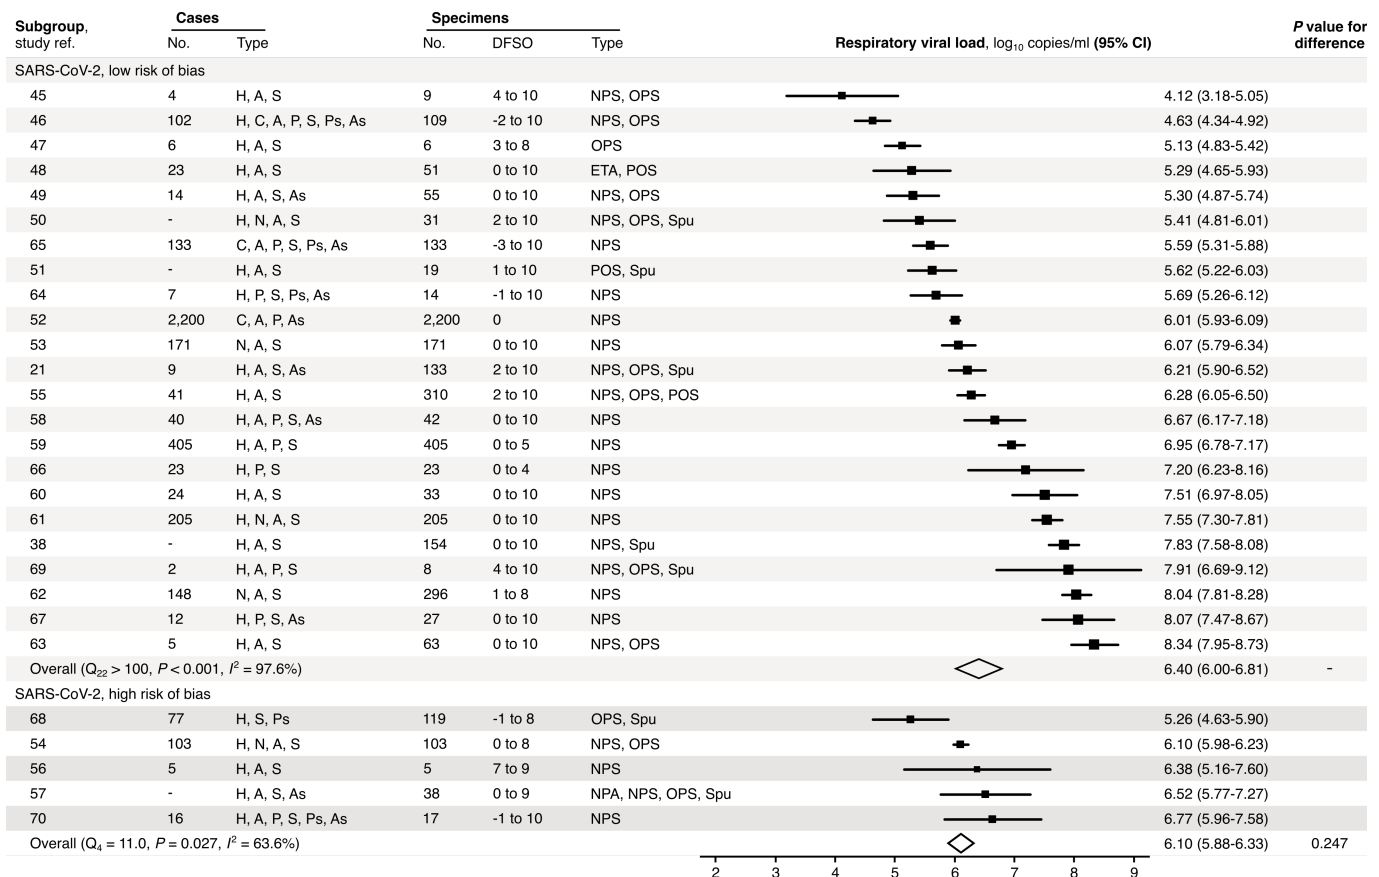

401

402 **Fig. S3. Risk-of-bias sensitivity analysis of between-study heterogeneity for SARS-CoV-2**

403 **rVL during the infectious period.** Random-effects meta-analyses, based on the risk of bias of

404 contributing studies, of the expected respiratory viral loads (rVLs) of COVID-19 cases during

405 the infectious period. Quantitative rVLs refer to virus concentrations in the respiratory tract.

406 Case types: hospitalized (H), not admitted (N), community (C), adult (A), pediatric (P),

407 symptomatic (S), presymptomatic (Ps) and asymptomatic (As). Specimen types: endotracheal

408 aspirate (ETA), nasopharyngeal aspirate (NPA), nasopharyngeal swab (NPS), oropharyngeal

409 swab (OPS), posterior oropharyngeal saliva (POS) and sputum (Spu). Dashes denote case

410 numbers that were not obtained. Box sizes denote weighting in the overall estimates. One-sided

411 Welch's *t*-test for difference (non-significance,  $P > 0.05$ ). Between-study heterogeneity was

412 assessed using the  $P$ -value from Cochran's  $Q$  test (non-significance,  $P > 0.05$ ) and the  $I^2$  statistic  
413 ( $I^2 < 30\%$  indicates low between-study heterogeneity).

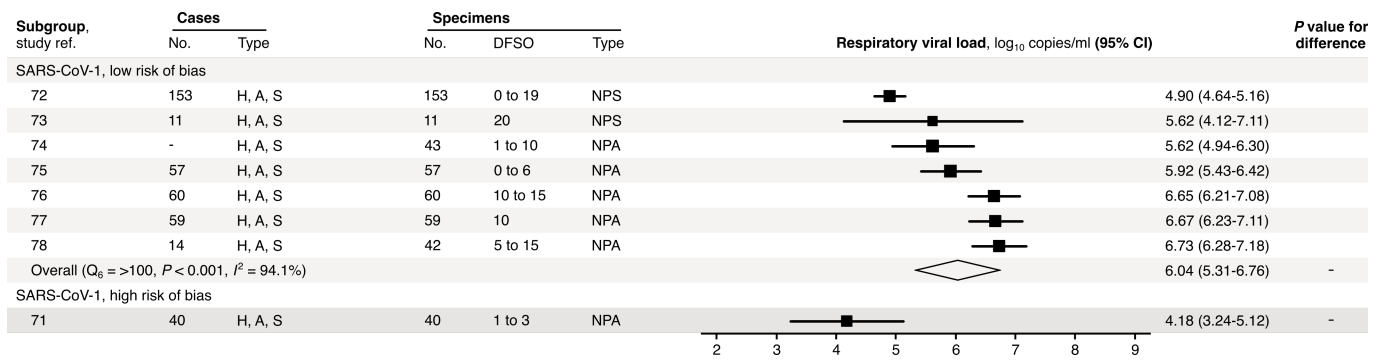

414

415 **Fig. S4. Risk-of-bias sensitivity analysis of between-study heterogeneity for SARS-CoV-1**  
 416 **rVL during the infectious period.** Random-effects meta-analyses, based on the risk of bias of  
 417 contributing studies, of the expected respiratory viral loads (rVLs) of SARS cases during the  
 418 infectious period. Quantitative rVLs refer to virus concentrations in the respiratory tract. Case  
 419 types: hospitalized (H), adult (A) and symptomatic (S). Specimen types: nasopharyngeal aspirate  
 420 (NPA) and nasopharyngeal swab (NPS). Dashes denote case numbers that were not obtained.  
 421 Box sizes denote weighting in the overall estimates. One-sided Welch's *t*-test for difference,  
 422 non-significance ( $P > 0.05$ ). Between-study heterogeneity was assessed using the *P*-value from  
 423 Cochran's *Q* test (non-significance,  $P > 0.05$ ) and the *I*<sup>2</sup> statistic ( $I^2 < 30\%$  indicates low  
 424 between-study heterogeneity).



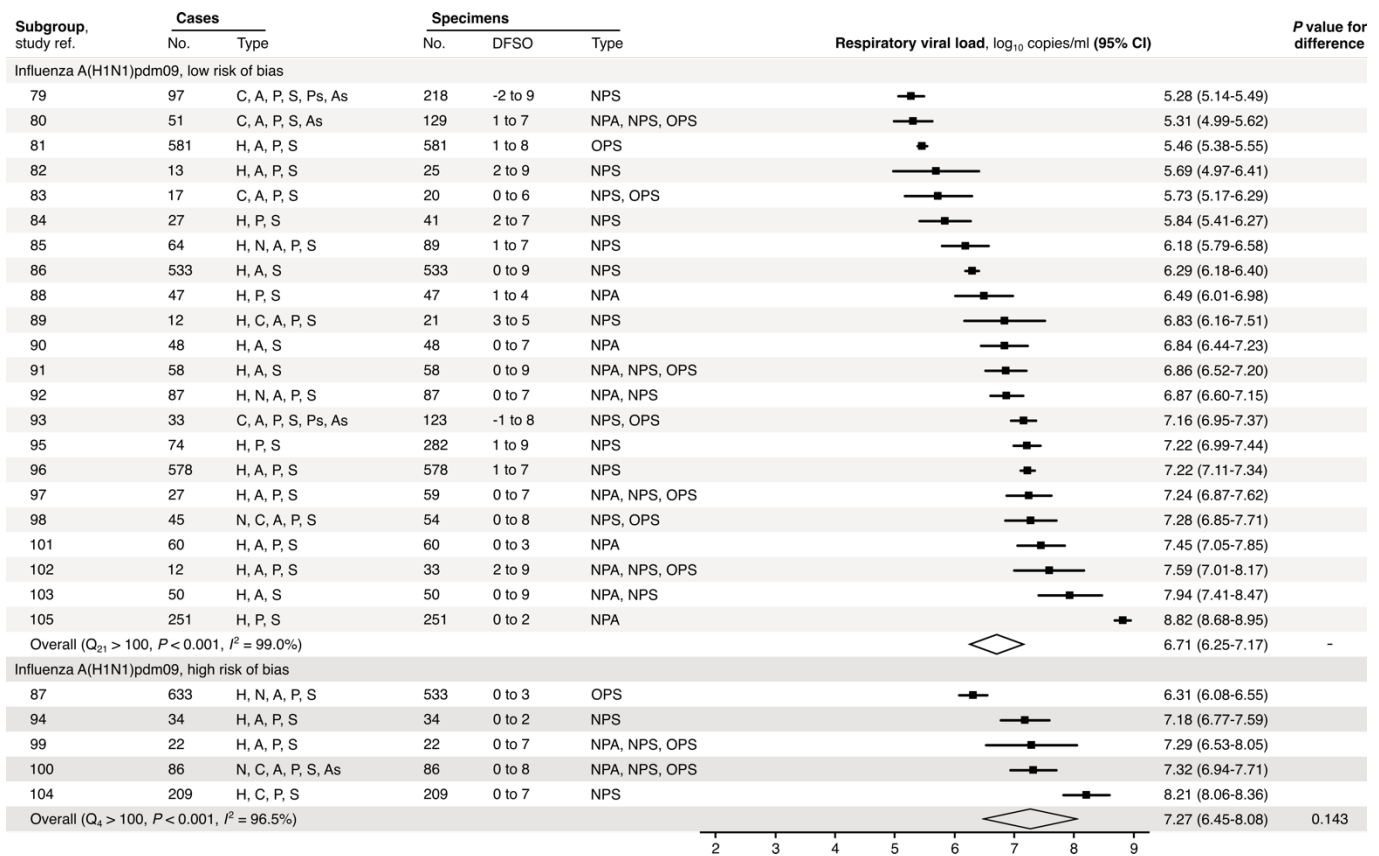

425

426 **Fig. S5. Risk-of-bias sensitivity analysis of between-study heterogeneity for A(H1N1)pdm09**

427 **rVL during the infectious period.** Random-effects meta-analyses, based on the risk of bias of

428 contributing studies, of the expected respiratory viral loads (rVLs) of A(H1N1)pdm09 cases

429 during the infectious period. Quantitative rVLs refer to virus concentrations in the respiratory

430 tract. Case types: hospitalized (H), not admitted (N), community (C), adult (A), pediatric (P),

431 symptomatic (S), presymptomatic (Ps) and asymptomatic (As). Specimen types: nasopharyngeal

432 aspirate (NPA), nasopharyngeal swab (NPS) and oropharyngeal swab (OPS). Dashes denote case

433 numbers that were not obtained. Box sizes denote weighting in the overall estimates. One-sided

434 Welch's *t*-test for difference (non-significance,  $P > 0.05$ ). Between-study heterogeneity was

435 assessed using the *P*-value from Cochran's *Q* test (non-significance,  $P > 0.05$ ) and the  $I^2$  statistic

436 ( $I^2 < 30\%$  indicates low between-study heterogeneity).

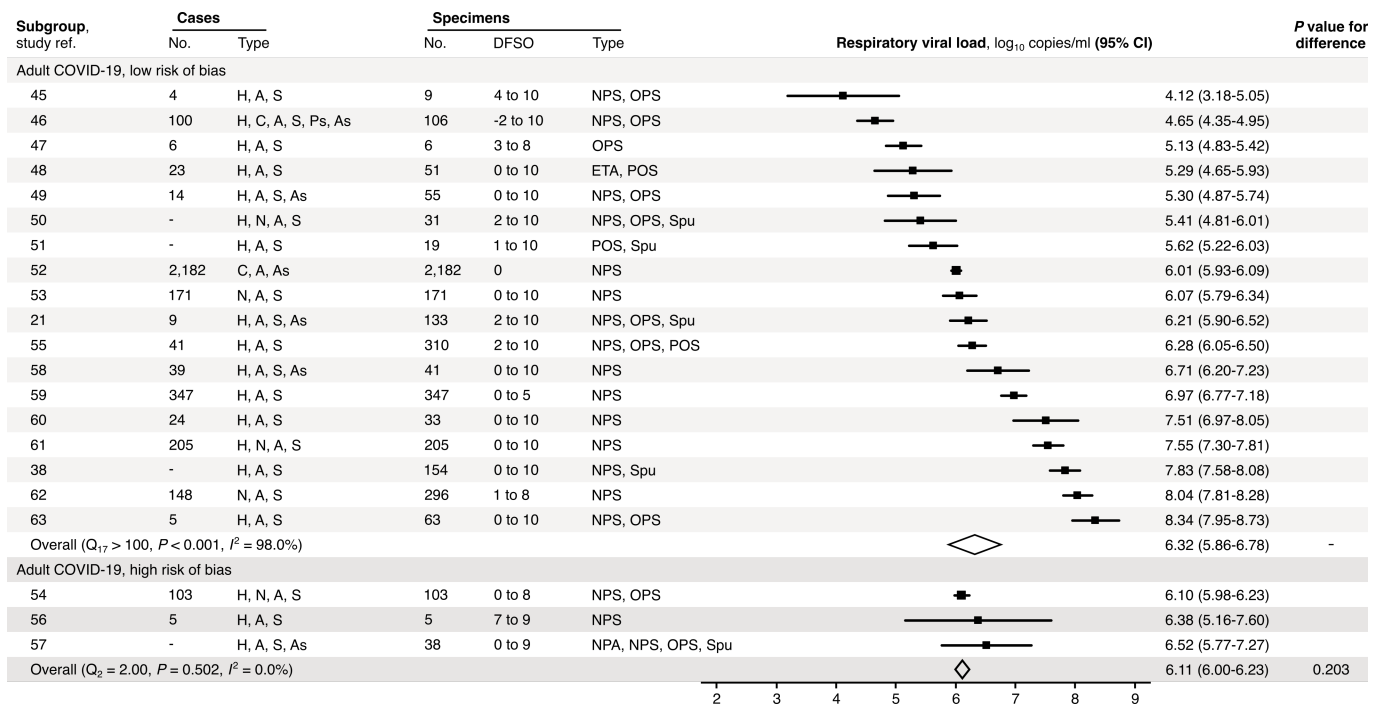

437

438 **Fig. S6. Risk-of-bias sensitivity analysis of between-study heterogeneity for SARS-CoV-2**  
439 **rVL for adult COVID-19 cases during the infectious period.** Random-effects meta-analyses,  
440 based on the risk of bias of contributing studies, of the expected respiratory viral loads (rVLs) of  
441 adult ( $\geq 18$  years old) COVID-19 cases during the infectious period. Quantitative rVLs refer to  
442 virus concentrations in the respiratory tract. Case types: hospitalized (H), not admitted (N),  
443 community (C), adult (A), pediatric (P), symptomatic (S), presymptomatic (Ps) and  
444 asymptomatic (As). Specimen types: endotracheal aspirate (ETA), nasopharyngeal aspirate  
445 (NPA), nasopharyngeal swab (NPS), oropharyngeal swab (OPS), posterior oropharyngeal saliva  
446 (POS) and sputum (Spu). Dashes denote case numbers that were not obtained. Box sizes denote  
447 weighting in the overall estimates. One-sided Welch's *t*-test for difference (non-significance,  $P >$   
448 0.05). Between-study heterogeneity was assessed using the  $P$ -value from Cochran's  $Q$  test (non-  
449 significance,  $P > 0.05$ ) and the  $I^2$  statistic ( $I^2 < 30\%$  indicates low between-study heterogeneity).

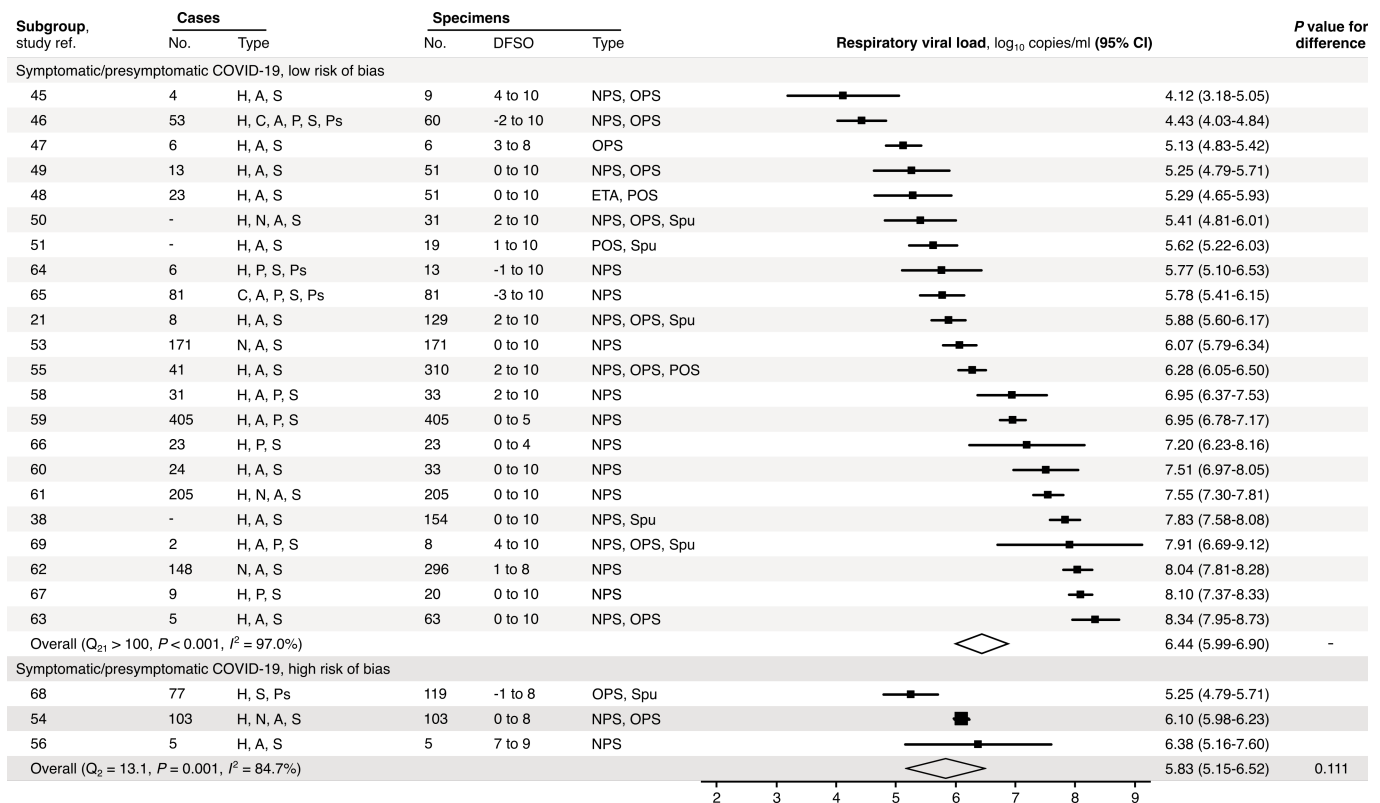

450

451 **Fig. S7. Risk-of-bias sensitivity analysis of between-study heterogeneity for SARS-CoV-2**  
 452 **rVL for symptomatic/presymptomatic COVID-19 cases during the infectious period.**

453 Random-effects meta-analyses, based on the risk of bias of contributing studies, of the expected  
 454 respiratory viral loads (rVLs) of symptomatic/presymptomatic ( $\geq 18$  years old) COVID-19 cases  
 455 during the infectious period. Quantitative rVLs refer to virus concentrations in the respiratory  
 456 tract. Case types: hospitalized (H), not admitted (N), community (C), adult (A), pediatric (P),  
 457 symptomatic (S), presymptomatic (Ps) and asymptomatic (As). Specimen types: endotracheal  
 458 aspirate (ETA), nasopharyngeal swab (NPS), oropharyngeal swab (OPS), posterior  
 459 oropharyngeal saliva (POS) and sputum (Spu). Dashes denote case numbers that were not  
 460 obtained. Box sizes denote weighting in the overall estimates. One-sided Welch's *t*-test for  
 461 difference, non-significance ( $P > 0.05$ ). Between-study heterogeneity was assessed using the *P*-

462 value from Cochran's  $Q$  test (non-significance,  $P > 0.05$ ) and the  $I^2$  statistic the  $I^2$  statistic ( $I^2 <$   
463 30% indicates low between-study heterogeneity).

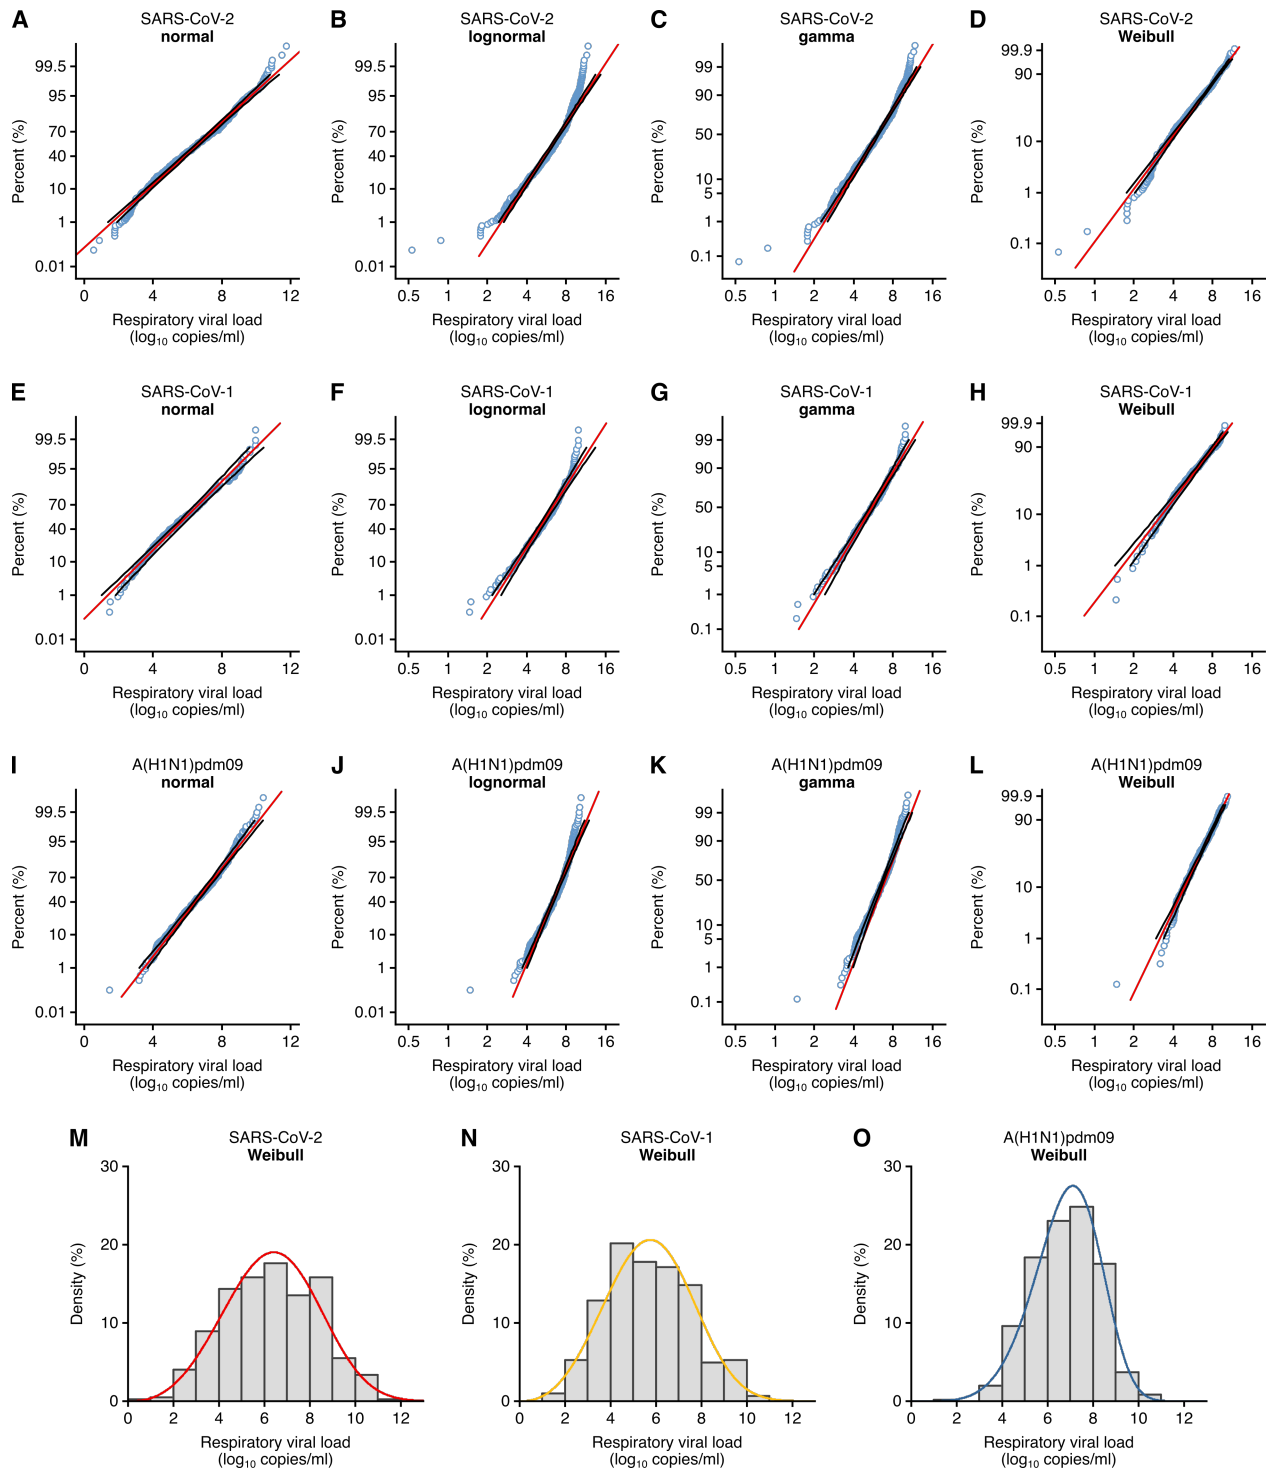

464

465 **Fig. S8. Respiratory viral loads for SARS-CoV-2, SARS-CoV-1 and A(H1N1)pdm09 best**

466 **conform to Weibull distributions. (A to D) Normal ( $P \leq 0.01$ ) (A), lognormal ( $P \leq 0.01$ ) (B),**

467 **gamma ( $P \leq 0.005$ ) (C) and Weibull ( $P > 0.10$ , not significant [NS]) (D) probability plots for**

468 individual sample data of SARS-CoV-2 rVLs across days from symptom onset in the systematic  
469 dataset ( $N = 941$  samples from  $N = 20$  studies). (**E to H**) Normal ( $P > 0.05$ , NS) (E), lognormal  
470 ( $P \leq 0.01$ ) (F), gamma ( $P > 0.05$ , NS) (G) and Weibull ( $P > 0.10$ , NS) (H) probability plots for  
471 individual sample data of SARS-CoV-1 rVLs in the systematic dataset ( $N = 303$  samples from  $N$   
472  $= 5$  studies). (**I to L**) Normal ( $P \leq 0.01$ ) (I), lognormal ( $P \leq 0.01$ ) (J), gamma ( $P \leq 0.005$ ) (K) and  
473 Weibull ( $P > 0.10$ , NS) (L) probability plots for individual sample data of A(H1N1)pdm09 rVLs  
474 in the systematic dataset ( $N = 512$  samples from  $N = 10$  studies). These categories included only  
475 rVL data from positive (above the detection limit) qRT-PCR measurements. The  $P$ -values were  
476 determined using the modified Kolmogorov-Smirnov test for the goodness of fit of each  
477 distribution. When the null hypothesis is accepted (NS at  $P > 0.05$ ), the probability density  
478 function cannot be rejected to describe the distribution of the data. Blue circles, black lines and  
479 red lines represent individual sample data, expected distributions and 95% CIs, respectively. (**M**  
480 to **O**) Histograms and fitted Weibull distributions of the above data for SARS-CoV-2 (M),  
481 SARS-CoV-1 (N) and A(H1N1)pdm09 (O).

482



484 **Fig. S9. Case heterogeneity in rVLs across viruses, COVID-19 subgroups and disease**  
485 **course.** (A to C) Estimated respiratory viral loads (rVLs) of SARS-CoV-2 (A), SARS-CoV-1  
486 (B) and A(H1N1)pdm09 (C) across case percentile (cp) throughout the infectious periods. (D to  
487 G) Estimated SARS-CoV-2 rVLs for adult (D), pediatric (E), symptomatic/presymptomatic (F)  
488 and asymptomatic (G) cases across cp throughout the infectious period. (H to S) Estimated  
489 SARS-CoV-2 rVLs across cp on different days from symptom onset (DFSO) during the  
490 infectious period. Earlier DFSO were excluded based on limited data. Data ranged between the  
491 1<sup>st</sup> and 99<sup>th</sup> cps. Sample numbers, distribution parameters and descriptive statistics are  
492 summarized in Table S7. Lines and bands represent estimates and 95% CIs, respectively.



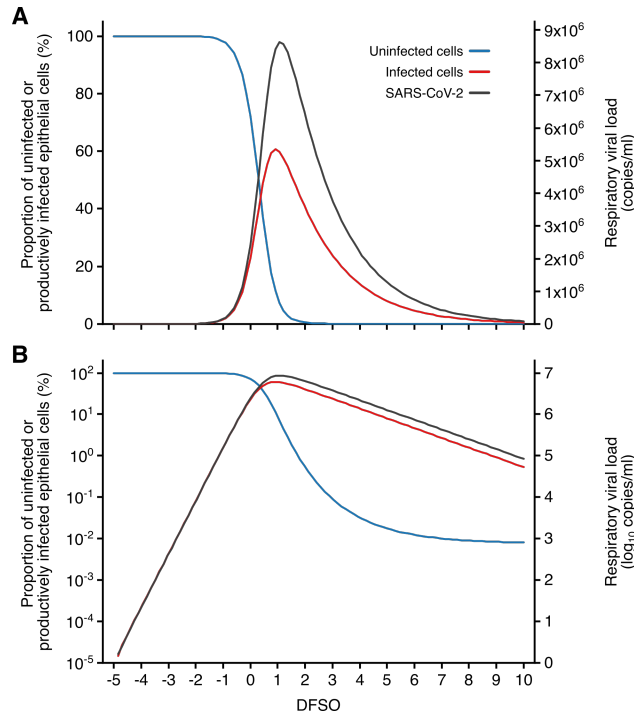

493

494 **Fig. S10. Kinetics of SARS-CoV-2 and airway epithelial cells during respiratory infection.**

495 (A and B) Estimated kinetics of uninfected (blue) and productively infected (red) airway

496 epithelial cells (left axis) and SARS-CoV-2 (right axis) in the respiratory tract, as shown in linear

497 (A) and logarithmic (B) scales.

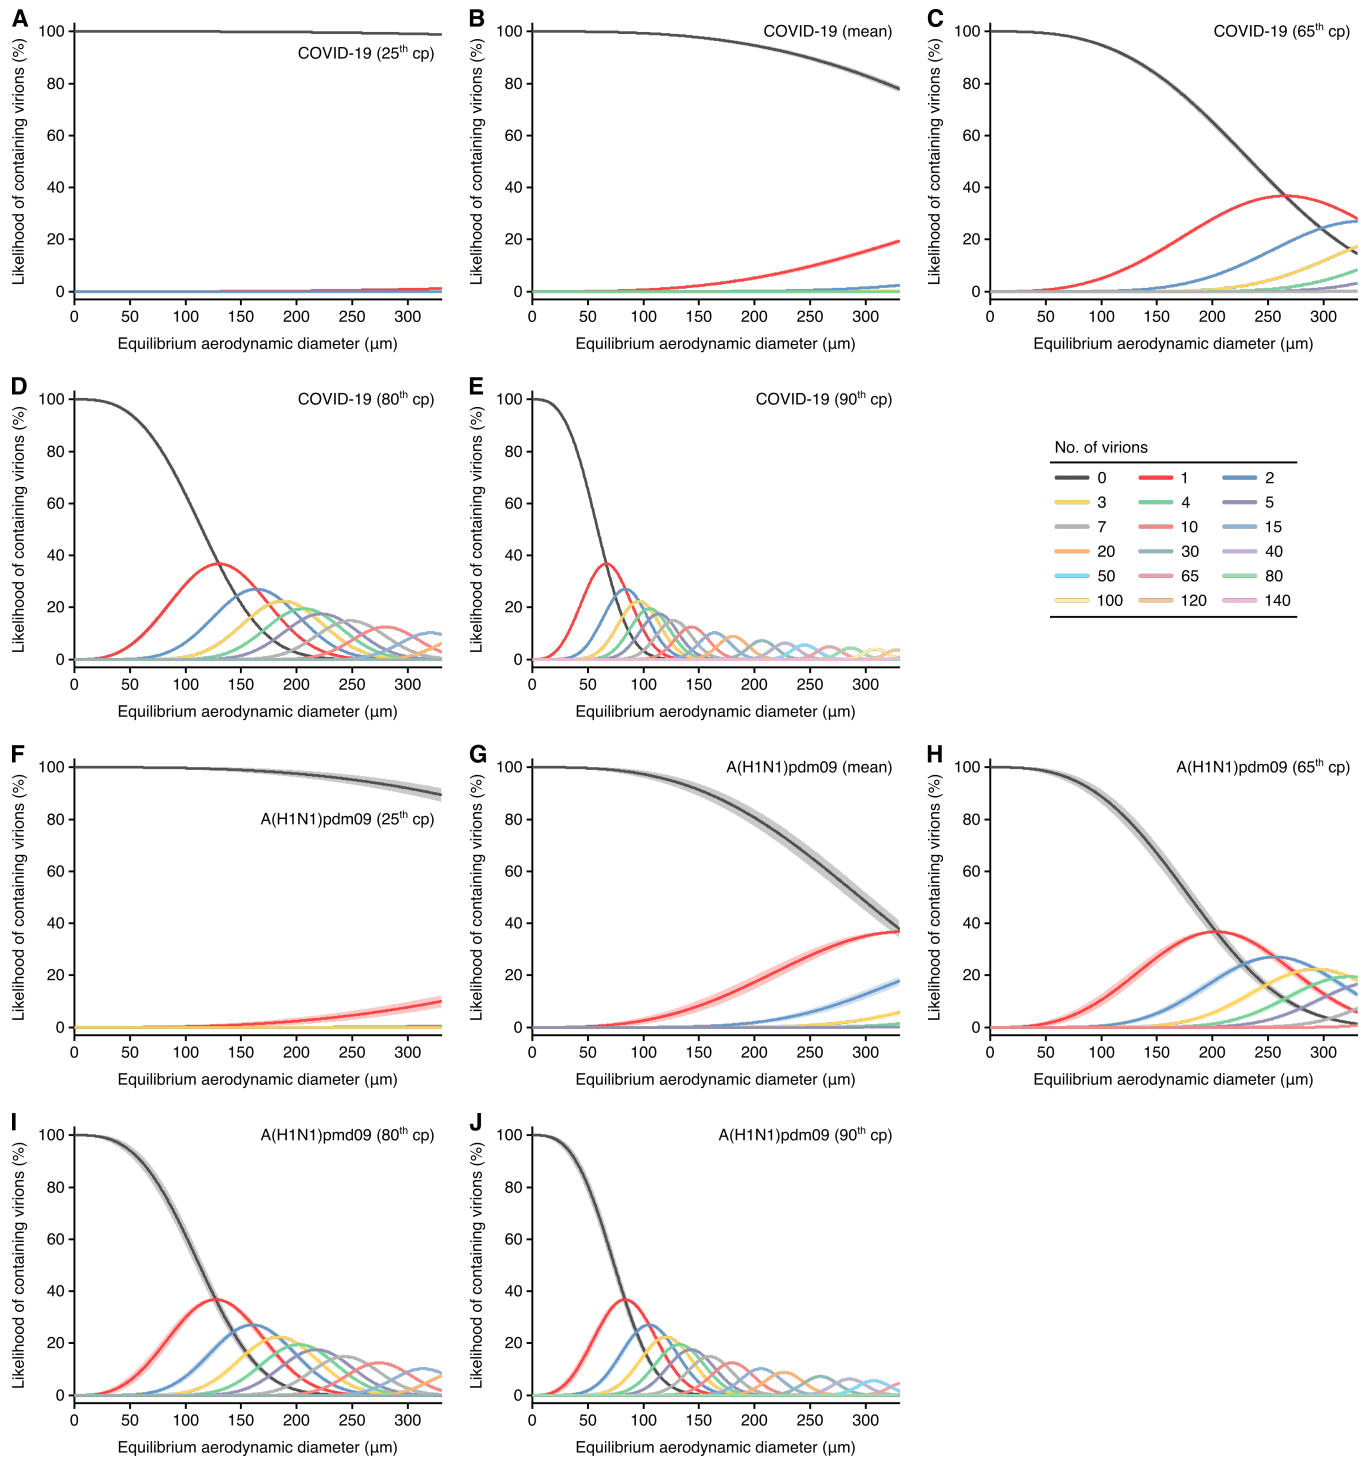

498

499 **Fig. S11. Likelihood of respiratory particles containing SARS-CoV-2 or A(H1N1)pdm09.**

500 (A to E) Estimated likelihood that droplets and aerosols contain viable SARS-CoV-2 when

501 expelled by the 25<sup>th</sup> case percentile (cp) (A), mean (B), 65<sup>th</sup> cp (C), 80<sup>th</sup> cp (D) or 90<sup>th</sup> cp (E) for

502 COVID-19 cases during the infectious period. (F to J) Estimated likelihood that droplets and  
503 aerosols contain viable A(H1N1)pdm09 when expelled by the 25<sup>th</sup> cp (F), mean (G), 65<sup>th</sup> cp (H),  
504 80<sup>th</sup> cp (I) or 90<sup>th</sup> cp (J) for A(H1N1)pmd09 cases during the infectious period. For higher no. of  
505 virions, some likelihood curves were omitted to aid visualization. When the likelihood for 0  
506 virions approaches 0%, particles are expected to contain at least one viable copy. Lines and  
507 bands represent estimates and 95% CIs, respectively, for estimated likelihoods.

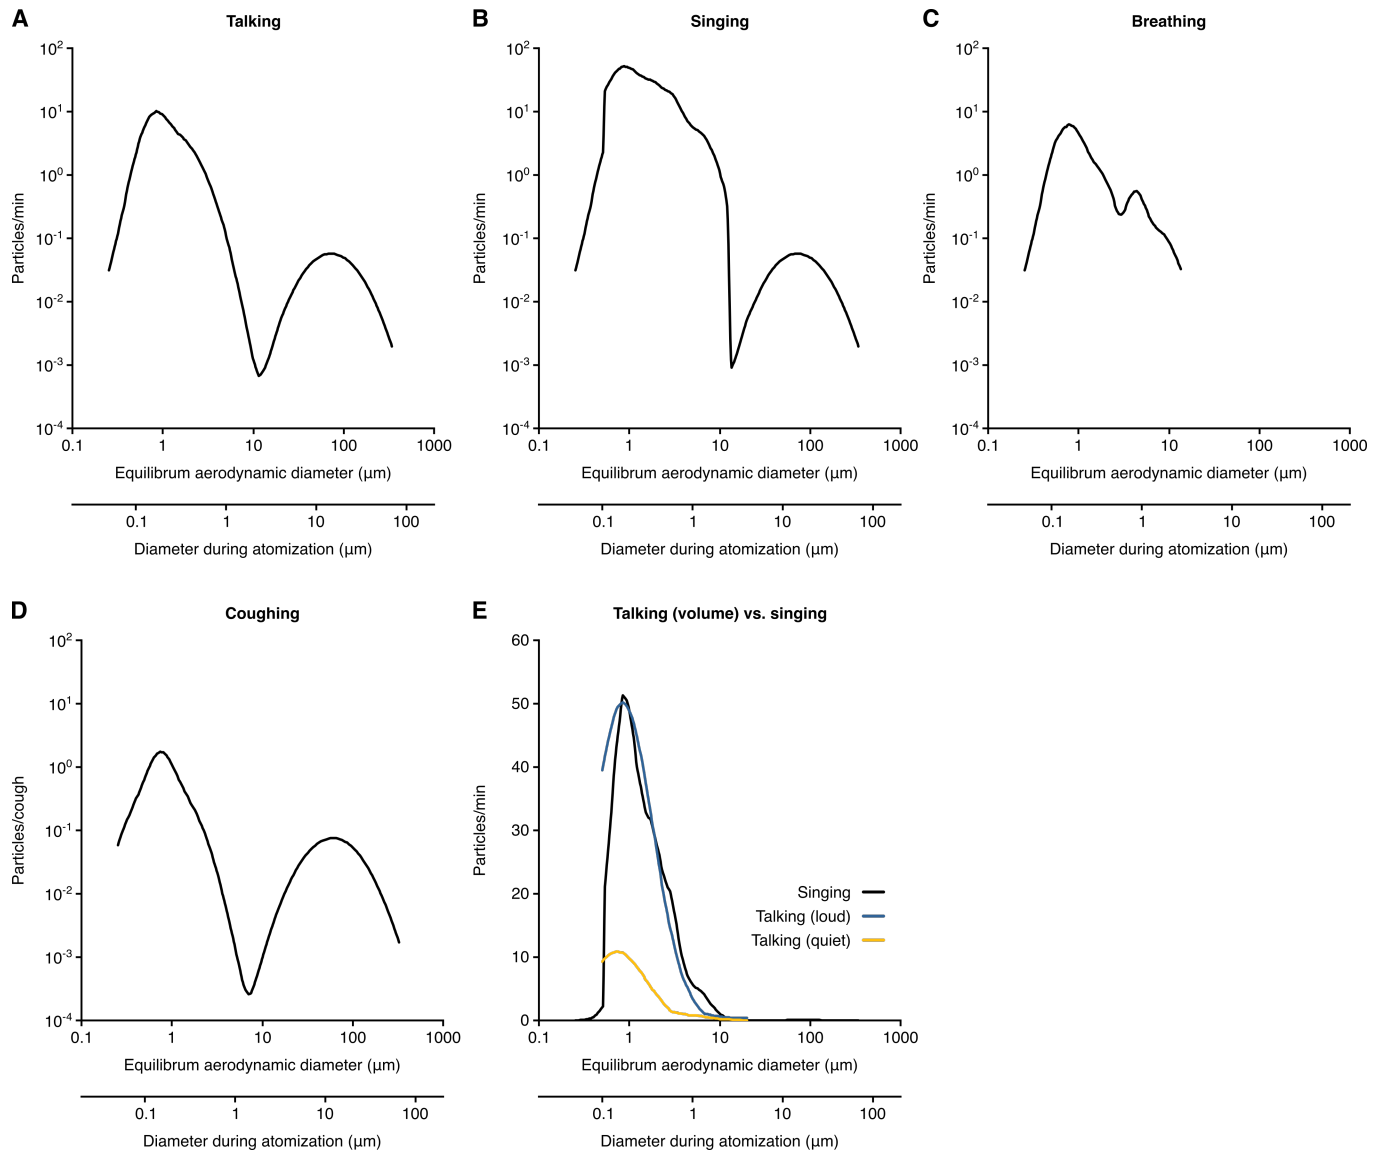

508

509 **Fig. S12. Rate profiles for particle expelled by respiratory activities.** (A to D) Rate profiles of  
 510 particles expelled while talking (A), singing (B), breathing (C) and coughing (D). (E)  
 511 Comparison of the rate profiles of aerosol emission from singing and different amplitudes of  
 512 talking. The rate profiles were calculated from the normalized concentrations in Johnson et al  
 513 (117) (A, B, D and E) and Morawaska et al (118) (C) or collected from Asadi et al (119) (E).  
 514 Dehydrated particle diameters were taken to be 0.5 times the hydrated diameter during

515 atomization. Breathing was taken to expel negligible quantities of larger particles based on the  
516 bronchiolar fluid film burst mechanism.

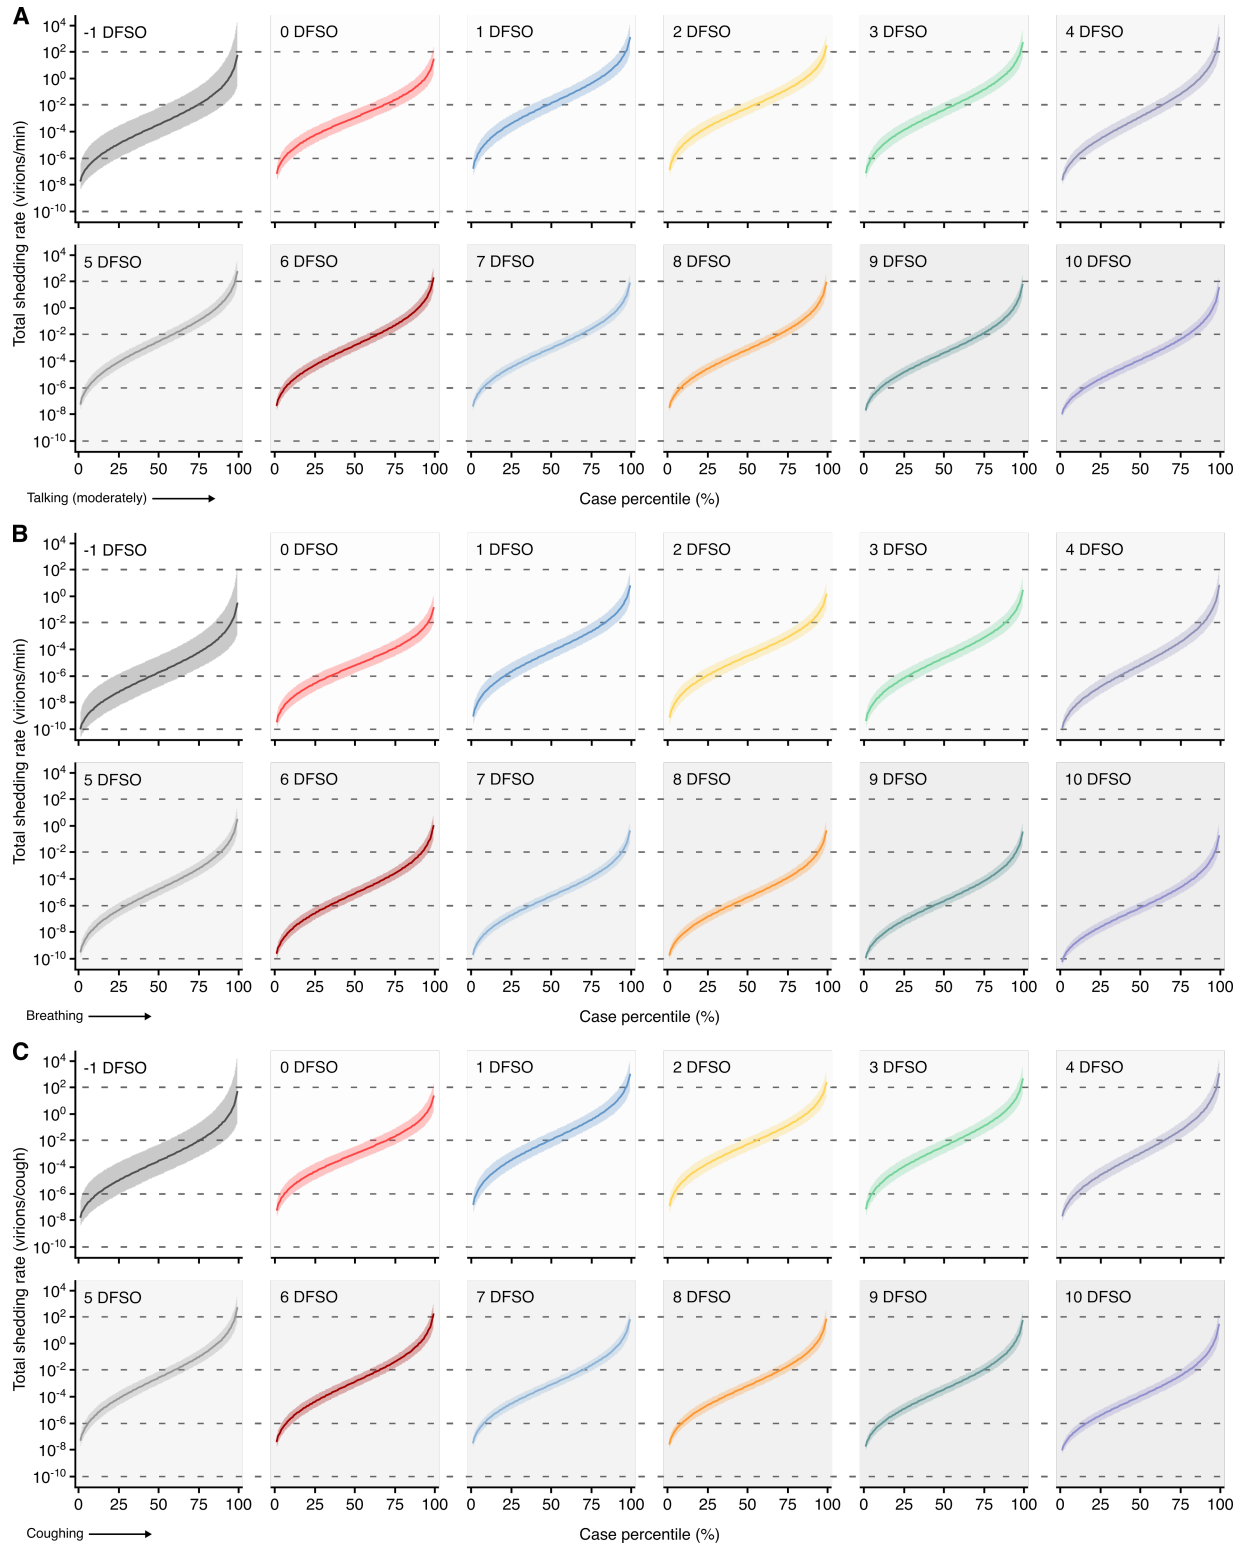

517

518 **Fig. S13. Heterogeneity in shedding SARS-CoV-2 via talking, breathing and coughing. (A to**

519 **C) Case heterogeneity in the total SARS-CoV-2 shedding rate (over all particle sizes) by talking**

520 at a moderate amplitude (A), breathing (B) or coughing (C) for COVID-19 cases across the  
521 infectious period. Earlier presymptomatic days were excluded based on limited data. Data  
522 represent estimated rates for viable virus and range between the 1<sup>st</sup> and 99<sup>th</sup> cps. Lines and bands  
523 represent estimates and 95% CIs, respectively.

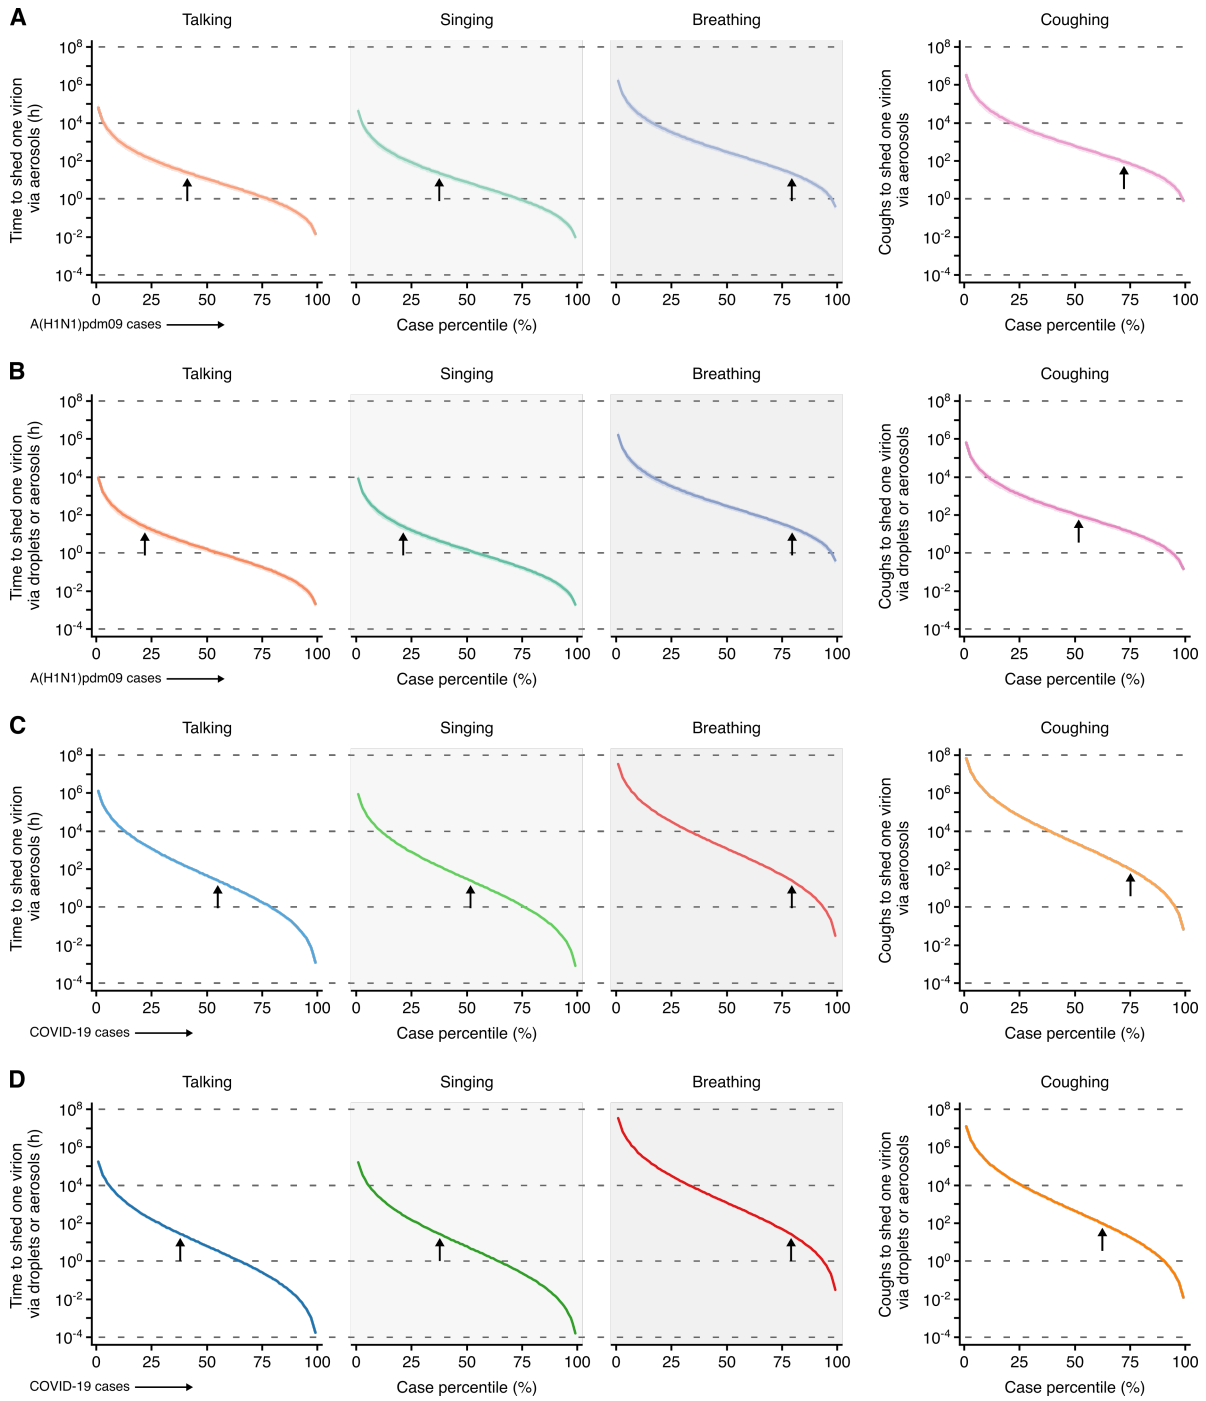

524

525 **Fig. S14. Heterogeneity in infectiousness for COVID-19 and A(H1N1)pdm09 cases during**  
 526 **the infectious period. (A and B) Estimated time for a A(H1N1)pdm09 case to expel one virion**  
 527 **via only aerosols (A) or either droplets or aerosols (B) by talking, singing, breathing or coughing.**  
 528 **(C and D) Estimated time for a COVID-19 case to expel one SARS-CoV-2 virion via only**



529 aerosols (C) or either droplets or aerosols (D) by talking, singing, breathing or coughing. Data  
530 represent estimated times to expel viable virus and range between the 1<sup>st</sup> and 99<sup>th</sup> case percentiles  
531 (cps). Vertical arrows depict the cp expected to shed 1 virion in 24 h (talking, singing or  
532 breathing) or 100 coughs. Lines and bands represent estimates and 95% CIs, respectively.

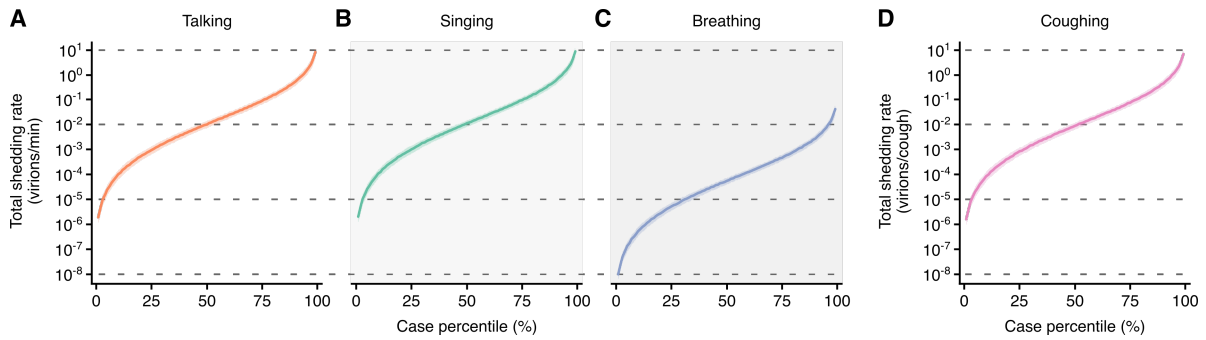

533

534 **Fig. S15. Heterogeneity in shedding A(H1N1)pdm09 via droplets and aerosols. (A to D)**

535 Case heterogeneity in the total A(H1N1)pdm09 shedding rates while talking (A), singing (B),

536 breathing (C) and coughing (D) during the infectious period. Data represent estimated rates for

537 viable virus and range between the 1<sup>st</sup> and 99<sup>th</sup> cps. Lines and bands represent estimates and 95%

538 CIs, respectively.

## Supplementary Tables

**Table S1. Search strategy used for MEDLINE.**

| Database: Ovid MEDLINE® and Epub Ahead of Print, In-Process & Other Non-Indexed Citations and Daily 1946 to August 07, 2020 |                                                                                                                                                                                                                                                                                                                                                           |
|-----------------------------------------------------------------------------------------------------------------------------|-----------------------------------------------------------------------------------------------------------------------------------------------------------------------------------------------------------------------------------------------------------------------------------------------------------------------------------------------------------|
| #                                                                                                                           | Searches                                                                                                                                                                                                                                                                                                                                                  |
| 1                                                                                                                           | exp Coronavirus/                                                                                                                                                                                                                                                                                                                                          |
| 2                                                                                                                           | exp Coronavirus Infections/                                                                                                                                                                                                                                                                                                                               |
| 3                                                                                                                           | exp Betacoronavirus/                                                                                                                                                                                                                                                                                                                                      |
| 4                                                                                                                           | (coronavirus* or corona virus* or betacoronavirus* or OC43 or NL63 or 229E or HKU1 or HcoV* or ncov* or covid* or sars-cov* or sarscov* or Sars-coronavirus* or Severe Acute Respiratory Syndrome* or sudden acute respiratory syndrome*).tw,kf.                                                                                                          |
| 5                                                                                                                           | (2019nCov* or 2019-novel CoV or corona or covid19 or ((novel or new or nouveau) adj2 (CoV or Pandemi*))).tw,kf.                                                                                                                                                                                                                                           |
| 6                                                                                                                           | (pneumonia.tw,kf. Or exp pneumonia/) and (Wuhan or Hubei).tw,kf.                                                                                                                                                                                                                                                                                          |
| 7                                                                                                                           | COVID-19.rx,px,ox. Or severe acute respiratory syndrome coronavirus 2.os.                                                                                                                                                                                                                                                                                 |
| 8                                                                                                                           | exp Influenza A Virus, H1N1 Subtype/                                                                                                                                                                                                                                                                                                                      |
| 9                                                                                                                           | (“A/H1N1*” or H1N1* or pdm09 or ((influenza or virus or pandemic) adj4 “2009”) or influenza A or swine flu).tw,kf.                                                                                                                                                                                                                                        |
| 10                                                                                                                          | 1 or 2 or 3 or 4 or 5 or 6 or 7 or 8 or 9                                                                                                                                                                                                                                                                                                                 |
| 11                                                                                                                          | ((respiratory adj3 (specimen* or sample* or swab*)) or sputum or nares or endotrachea* or endotrache* or endotra* or ((nasal or oral* or throat) adj3 (swab* or sample* or smear* or specimen*)) or NPS or OPS or ((endotrachea* or endotracheal*) adj2 aspirat*) or NPA or ETA or (deep adj4 saliva) or POS or “swab sample*” or “flocked swab*”).tw,kf. |
| 12                                                                                                                          | Nasal cavity/vi                                                                                                                                                                                                                                                                                                                                           |
| 13                                                                                                                          | Sputum/vi                                                                                                                                                                                                                                                                                                                                                 |
| 14                                                                                                                          | Nasopharynx/vi                                                                                                                                                                                                                                                                                                                                            |
| 15                                                                                                                          | Oropharynx/vi                                                                                                                                                                                                                                                                                                                                             |
| 16                                                                                                                          | *Saliva/vi                                                                                                                                                                                                                                                                                                                                                |
| 17                                                                                                                          | Pharynx/vi                                                                                                                                                                                                                                                                                                                                                |
| 18                                                                                                                          | (clinical adj2 (sample* or specimen*)).tw,kf.                                                                                                                                                                                                                                                                                                             |
| 19                                                                                                                          | (“RT-PCR” or “RTPCR” or “ddPCR” or “polymerase chain reaction”).tw,kf.                                                                                                                                                                                                                                                                                    |
| 20                                                                                                                          | Influenza, Human/vi                                                                                                                                                                                                                                                                                                                                       |
| 21                                                                                                                          | exp Coronavirus Infections/vi or exp Coronavirus/vi or exp Betacoronavirus/vi                                                                                                                                                                                                                                                                             |
| 22                                                                                                                          | polymerase chain reaction/ or multiplex polymerase chain reaction/ or real-time polymerase chain reaction/ or reverse transcriptase polymerase chain reaction/                                                                                                                                                                                            |
| 23                                                                                                                          | 11 or 12 or 13 or 14 or 15 or 16 or 17 or 18 or 19 or 20 or 21 or 22                                                                                                                                                                                                                                                                                      |
| 24                                                                                                                          | 10 and 23                                                                                                                                                                                                                                                                                                                                                 |
| 25                                                                                                                          | (vir* load* or vir* shed* or vir* burden or vir* titer* or vir* titre* or (vir* adj2 count*)).tw,kf.                                                                                                                                                                                                                                                      |

|    |                                                                                                                              |
|----|------------------------------------------------------------------------------------------------------------------------------|
| 26 | (((copies or copy) adj2 (ml* or milli* or microl*)) or ((RNA* or vir*) adj2 concentration*)).tw,kf.                          |
| 27 | ((calibration adj1 curve*) or (standard adj1 curve*)).tw,kf.                                                                 |
| 28 | ((ct* adj1 value*) or cycle threshold or (copies adj2 test*) or (copy adj2 test*) or ((copy or copies) adj2 number*)).tw,kf. |
| 29 | Viral load/                                                                                                                  |
| 30 | Viral shedding/                                                                                                              |
| 31 | (“copy/m*” or “copies/m*” or “copy/test*” or “copies/test*”).tw,kf.                                                          |
| 32 | ((test or diagnos*) adj2 sensitiv*).tw,kf.                                                                                   |
| 33 | 25 or 26 or 27 or 28 or 29 or 30 or 31 or 32                                                                                 |
| 34 | 24 and 33                                                                                                                    |
| 35 | animals/ not humans/                                                                                                         |
| 36 | 34 not 35                                                                                                                    |

**Table S2. Search strategy used for EMBASE.**

| Database: Embase 1974 to 2020 August 06 |                                                                                                                                                                                                                                                                                                                                                           |
|-----------------------------------------|-----------------------------------------------------------------------------------------------------------------------------------------------------------------------------------------------------------------------------------------------------------------------------------------------------------------------------------------------------------|
| #                                       | Searches                                                                                                                                                                                                                                                                                                                                                  |
| 1                                       | coronavirus infection/ or severe acute respiratory syndrome/                                                                                                                                                                                                                                                                                              |
| 2                                       | COVID 19/                                                                                                                                                                                                                                                                                                                                                 |
| 3                                       | coronavirus disease 2019/                                                                                                                                                                                                                                                                                                                                 |
| 4                                       | severe acute respiratory syndrome coronavirus 2/ or SARS coronavirus 2/                                                                                                                                                                                                                                                                                   |
| 5                                       | SARS coronavirus/ or betacoronavirus/                                                                                                                                                                                                                                                                                                                     |
| 6                                       | “influenza a virus (h1n1)”/                                                                                                                                                                                                                                                                                                                               |
| 7                                       | 2009 h1n1 influenza/ or “influenza a (h1n1)”/                                                                                                                                                                                                                                                                                                             |
| 8                                       | (coronavirus* or corona virus* or betacoronavirus* or OC43 or NL63 or 229E or HKU1 or HcoV* or ncov* or covid* or sars-cov* or sarscov* or Sars-coronavirus* or Severe Acute Respiratory Syndrome* or Sudden acute respiratory syndrome*).tw,kw.                                                                                                          |
| 9                                       | (2019nCov* or 2019-novel CoV or corona or covid19 or ((novel or new or nouveau) adj2 (CoV or Pandemi*))).tw,kw.                                                                                                                                                                                                                                           |
| 10                                      | (pneumonia.tw,kw. Or exp pneumonia/) and (Wuhan or Hubei).tw,kw.                                                                                                                                                                                                                                                                                          |
| 11                                      | (covid or SARS or H1N1 or coronavirus).ox.                                                                                                                                                                                                                                                                                                                |
| 12                                      | (“A/H1N1*” or H1N1* or pdm09 or ((influenza or virus or pandemic) adj4 “2009”) or influenza A or swine flu).tw,kw.                                                                                                                                                                                                                                        |
| 13                                      | 1 or 2 or 3 or 4 or 5 or 6 or 7 or 8 or 9 or 10 or 11 or 12                                                                                                                                                                                                                                                                                               |
| 14                                      | nose smear/                                                                                                                                                                                                                                                                                                                                               |
| 15                                      | smear/ or nose smear/ or sputum smear/                                                                                                                                                                                                                                                                                                                    |
| 16                                      | *sputum/                                                                                                                                                                                                                                                                                                                                                  |
| 17                                      | *nasopharynx/ or *pharynx/                                                                                                                                                                                                                                                                                                                                |
| 18                                      | throat culture/                                                                                                                                                                                                                                                                                                                                           |
| 19                                      | saliva analysis/                                                                                                                                                                                                                                                                                                                                          |
| 20                                      | *oropharynx/                                                                                                                                                                                                                                                                                                                                              |
| 21                                      | exp nasopharyngeal aspiration/                                                                                                                                                                                                                                                                                                                            |
| 22                                      | real time polymerase chain reaction/ or real time reverse transcription polymerase chain reaction/ or reverse transcription polymerase chain reaction/                                                                                                                                                                                                    |
| 23                                      | (clinical adj2 (sample* or specimen*)).tw,kw.                                                                                                                                                                                                                                                                                                             |
| 24                                      | ((respiratory adj3 (specimen* or sample* or swab*)) or sputum or nares or endotrachea* or endotrache* or endotra* or ((nasal or oral* or throat) adj3 (swab* or sample* or smear* or specimen*)) or NPS or OPS or ((endotrachea* or endotracheal*) adj2 aspirat*) or NPA or ETA or (deep adj4 saliva) or POS or “swab sample*” or “flocked swab*”).tw,kw. |
| 25                                      | (“RT-PCR” or “RTPCR” or “ddPCR” or “polymerase chain reaction”).tw,kw.                                                                                                                                                                                                                                                                                    |
| 26                                      | *2009 H1N1 influenza/di or coronavirus disease 2019/di or Coronavirus infection/di                                                                                                                                                                                                                                                                        |
| 27                                      | 14 or 15 or 16 or 17 or 18 or 19 or 20 or 21 or 22 or 23 or 24 or 25 or 26                                                                                                                                                                                                                                                                                |

|    |                                                                                                                              |
|----|------------------------------------------------------------------------------------------------------------------------------|
| 28 | 13 and 27                                                                                                                    |
| 29 | virus load/                                                                                                                  |
| 30 | virus shedding/                                                                                                              |
| 31 | (vir* load* or vir* shed* or vir* burden or vir* titer* or vir* titre* or (vir* adj2 count*)).tw,kw.                         |
| 32 | ((copies or copy) adj2 (ml* or milli* or microl*)) or ((RNA* or vir*) adj2 concentration*).tw,kw.                            |
| 33 | ((calibration adj1 curve*) or (standard adj1 curve*)).tw,kw.                                                                 |
| 34 | ((ct* adj1 value*) or cycle threshold or (copies adj2 test*) or (copy adj2 test*) or ((copy or copies) adj2 number*)).tw,kw. |
| 35 | ("copy/m*" or "copies/m*" or "copy/test*" or "copies/test*").tw,kw.                                                          |
| 36 | ((test or diagnos*) adj2 sensitiv*).tw,kw.                                                                                   |
| 37 | 29 or 30 or 31 or 32 or 33 or 34 or 35 or 36                                                                                 |
| 38 | 28 and 37                                                                                                                    |
| 39 | exp animal/ not human/                                                                                                       |
| 40 | 38 not 39                                                                                                                    |

**Table S3. Search strategy used for Cochrane Central.**

| Database(s): EBM Reviews – Cochrane Central Register of Controlled Trials July 2020 |                                                                                                                                                                                                                                                                                                                                                           |
|-------------------------------------------------------------------------------------|-----------------------------------------------------------------------------------------------------------------------------------------------------------------------------------------------------------------------------------------------------------------------------------------------------------------------------------------------------------|
| #                                                                                   | Searches                                                                                                                                                                                                                                                                                                                                                  |
| 1                                                                                   | exp Coronavirus/                                                                                                                                                                                                                                                                                                                                          |
| 2                                                                                   | exp Coronavirus Infections/                                                                                                                                                                                                                                                                                                                               |
| 3                                                                                   | betacoronavirus/                                                                                                                                                                                                                                                                                                                                          |
| 4                                                                                   | (coronavirus* or corona virus* or betacoronavirus* or OC43 or NL63 or 229E or HKU1 or HcoV* or ncov* or covid* or sars-cov* or sarscov* or Sars-coronavirus* or Severe Acute Respiratory Syndrome* or sudden acute respiratory syndrome*).tw,kw.                                                                                                          |
| 5                                                                                   | (2019nCov* or 2019-novel CoV or corona or covid19 or ((novel or new or nouveau) adj2 (CoV or Pandemi*))).tw,kw.                                                                                                                                                                                                                                           |
| 6                                                                                   | (pneumonia.tw,kw. Or exp pneumonia/) and (Wuhan or Hubei).tw,kw.                                                                                                                                                                                                                                                                                          |
| 7                                                                                   | exp Influenza A Virus, H1N1 Subtype/                                                                                                                                                                                                                                                                                                                      |
| 8                                                                                   | (“A/H1N1*” or H1N1* or pdm09 or ((influenza or virus or pandemic) adj4 “2009”) or influenza A or swine flu).tw,kw.                                                                                                                                                                                                                                        |
| 9                                                                                   | 1 or 2 or 3 or 4 or 5 or 6 or 7 or 8                                                                                                                                                                                                                                                                                                                      |
| 10                                                                                  | ((respiratory adj3 (specimen* or sample* or swab*)) or sputum or nares or endotrachea* or endotrache* or endotra* or ((nasal or oral* or throat) adj3 (swab* or sample* or smear* or specimen*)) or NPS or OPS or ((endotrachea* or endotracheal*) adj2 aspirat*) or NPA or ETA or (deep adj4 saliva) or POS or “swab sample*” or “flocked swab*”).tw,kw. |
| 11                                                                                  | Nasal cavity/                                                                                                                                                                                                                                                                                                                                             |
| 12                                                                                  | Sputum/                                                                                                                                                                                                                                                                                                                                                   |
| 13                                                                                  | Nasopharynx/                                                                                                                                                                                                                                                                                                                                              |
| 14                                                                                  | Oropharynx/                                                                                                                                                                                                                                                                                                                                               |
| 15                                                                                  | *Saliva/                                                                                                                                                                                                                                                                                                                                                  |
| 16                                                                                  | Pharynx/                                                                                                                                                                                                                                                                                                                                                  |
| 17                                                                                  | (clinical adj2 (sample* or specimen*)).tw,kw.                                                                                                                                                                                                                                                                                                             |
| 18                                                                                  | (“RT-PCR” or “RTPCR” or “ddPCR” or “polymerase chain reaction”).tw,kw.                                                                                                                                                                                                                                                                                    |
| 19                                                                                  | exp Coronavirus Infections/vi or exp Coronavirus/vi or exp Betacoronavirus/vi                                                                                                                                                                                                                                                                             |
| 20                                                                                  | polymerase chain reaction/ or multiplex polymerase chain reaction/ or real-time polymerase chain reaction/ or reverse transcriptase polymerase chain reaction/                                                                                                                                                                                            |
| 21                                                                                  | 10 or 11 or 12 or 13 or 14 or 15 or 16 or 17 or 18 or 19 or 20                                                                                                                                                                                                                                                                                            |
| 22                                                                                  | 9 and 21                                                                                                                                                                                                                                                                                                                                                  |
| 23                                                                                  | (vir* load* or vir* shed* or vir* burden or vir* titer* or vir* titre* or (vir* adj2 count*)).tw,kw.                                                                                                                                                                                                                                                      |
| 24                                                                                  | ((copies or copy) adj2 (ml* or milli* or microl*)) or ((RNA* or vir*) adj2 concentration*).tw,kw.                                                                                                                                                                                                                                                         |
| 25                                                                                  | ((calibration adj1 curve*) or (standard adj1 curve*)).tw,kw.                                                                                                                                                                                                                                                                                              |

|    |                                                                                                                              |
|----|------------------------------------------------------------------------------------------------------------------------------|
| 26 | ((ct* adj1 value*) or cycle threshold or (copies adj2 test*) or (copy adj2 test*) or ((copy or copies) adj2 number*)).tw,kw. |
| 27 | Viral load/                                                                                                                  |
| 28 | Viral shedding/                                                                                                              |
| 29 | ("copy/m*" or "copies/m*" or "copy/test*" or "copies/test*").tw,kw.                                                          |
| 30 | ((test or diagnos*) adj2 sensitiv*).tw,kw.                                                                                   |
| 31 | 23 or 24 or 25 or 26 or 27 or 28 or 29 or 30                                                                                 |
| 32 | 22 and 31                                                                                                                    |



**Table S4. Search strategy used for Web of Science Core Collection.**

| Web of Science Core Collection |                                                                                                                                                                                                                                                                                                                                                                                                                                                                                                                                                                                                                                        |
|--------------------------------|----------------------------------------------------------------------------------------------------------------------------------------------------------------------------------------------------------------------------------------------------------------------------------------------------------------------------------------------------------------------------------------------------------------------------------------------------------------------------------------------------------------------------------------------------------------------------------------------------------------------------------------|
| #                              | Searches                                                                                                                                                                                                                                                                                                                                                                                                                                                                                                                                                                                                                               |
| #1                             | <p>TOPIC: ((coronavirus* or “corona virus*” or betacoronavirus* or OC43 or NL63 or 229E or HKU1 or HcoV* or ncov* or covid* or “sars-cov*” or sarscov* or “Sars-coronavirus*” or “Severe Acute Respiratory Syndrome*” or “sudden acute respiratory syndrome*” or “2019-ncov*” or 2019nCov* or “2019-novel CoV” or corona or ((novel or new or nouveau) NEAR/2 (CoV or Pandemi*)) OR (pneumonia and (Wuhan or Hubei) ) or “A/H1N1*” or H1N1* or pdm09 or ((influenza or virus or pandemic) NEAR/4 “2009”) or “influenza A” or “swine flu”))</p> <p>Indexes=SCI-EXPANDED, SSCI, A&amp;HCI, CPCI-S, CPCI-SSH, ESCI Timespan=All years</p> |
| #2                             | <p>TOPIC: (((respiratory NEAR/3 (specimen* or sample* or swab*)) or sputum or nares or endotrachea* or endotrache* or endotra* or ((nasal or oral* or throat) NEAR/3 (swab* or sample* or smear* or specimen*)) or NPS or OPS or ((endotrachea* or endotracheal*) NEAR/2 aspirat*) or NPA or ETA or (deep NEAR/4 saliva) or POS or “swab sample*” or “flocked swab*” or (clinical NEAR/2 (sample* or specimen*)) or “RT-PCR” or “RTPCR” or “ddPCR” or “polymerase chain reaction”))</p> <p>Indexes=SCI-EXPANDED, SSCI, A&amp;HCI, CPCI-S, CPCI-SSH, ESCI Timespan=All years</p>                                                        |
| #3                             | <p>TOPIC: ((“vir* load*” or “vir* shed*” or “vir* burden” or “vir* titer*” or “vir* titre*” or (vir* NEAR/2 count*) or ((copies or copy) NEAR/2 (ml or mls or milli* or microl*)) or ((RNA* or vir*) NEAR/2 concentration*) or (calibration NEAR/1 curve*) or (standard NEAR/1 curve*) or “ct value*” or “cycle threshold” or ((copies or copy) NEAR/2 test*) or ((copy or copies) NEAR/2 number*) or “copy/m*” or “copies/m*” or “copy/test*” or “copies/test*” or ((test or diagnos*) NEAR/2 sensitiv*))</p> <p>Indexes=SCI-EXPANDED, SSCI, A&amp;HCI, CPCI-S, CPCI-SSH, ESCI Timespan=All years</p>                                 |
| #4                             | <p>#3 AND #2 AND #1</p> <p>Refined by: [excluding] WEB OF SCIENCE CATEGORIES: ( VETERINARY SCIENCES )</p> <p>Indexes=SCI-EXPANDED, SSCI, A&amp;HCI, CPCI-S, CPCI-SSH, ESCI Timespan=All years</p>                                                                                                                                                                                                                                                                                                                                                                                                                                      |

**Table S5. Search strategy used for medRxiv and bioRxiv.**

| <b>medRxiv + bioRxiv (via Publish or Perish program)</b>                                                                                                                                                                                                 |
|----------------------------------------------------------------------------------------------------------------------------------------------------------------------------------------------------------------------------------------------------------|
| <b>Keywords:</b> (covid OR coronavirus OR ncov OR hcov OR h1n1 OR “swine flu” OR COVID19 or SARS) AND (“copies/ml” OR “copy/ml” OR “viral load” OR “copies/test” OR “copy/test” OR “copies per ml” OR “copy per ml”)<br><b>Publication name:</b> MedRxiv |
| <b>Keywords:</b> (covid OR coronavirus OR ncov OR hcov OR h1n1 OR “swine flu” OR COVID19 or SARS) AND (“copies/ml” OR “copy/ml” OR “viral load” OR “copies/test” OR “copy/test” OR “copies per ml” OR “copy per ml”)<br><b>Publication name:</b> BioRxiv |

**Table S6. Characteristics of contributing studies.**

| Study*                          | Country     | No. of cases included (no. of specimens) | No. of pediatric cases (no. of specimens) | No. of asymptomatic cases (no. of specimens) | Disease caused by virus | Case definition (WHO) | Pharmacotherapy (type) <sup>†</sup>        | Individual data extracted (diluent volume reported) <sup>‡</sup> | Adjusted viral load <sup>§</sup> (type of specimen) | Weight, % (meta-analysis category) <sup>  </sup> | Weight, % (meta-regression) | Risk of bias <sup>¶</sup> |
|---------------------------------|-------------|------------------------------------------|-------------------------------------------|----------------------------------------------|-------------------------|-----------------------|--------------------------------------------|------------------------------------------------------------------|-----------------------------------------------------|--------------------------------------------------|-----------------------------|---------------------------|
| Argyropoulos et al. (2020) (61) | USA         | 205 (205)                                | 0                                         | 0                                            | COVID-19                | Confirmed             | No                                         | No (no)                                                          | Yes (NPS)                                           | 3.9 (V), 5.1 (A), 4.3 (S/Ps)                     | 2.11                        | *****                     |
| Baggio et al. (2020) (59)       | Switzerland | 405 (405)                                | 58 (58)                                   | 0                                            | COVID-19                | Confirmed             | No                                         | Yes (no)                                                         | Yes (NPS)                                           | 3.9 (V), 5.1 (A), 18.7 (P), 4.4 (S/Ps)           | 4.16                        | *****                     |
| Fajnzylber et al. (2020) (50)   | USA         | - (31)                                   | 0                                         | 0                                            | COVID-19                | Confirmed             | No                                         | Yes (yes)                                                        | Yes (NPS, OPS)<br>No (Spu)                          | 3.6 (V), 4.6 (A), 3.8 (S/Ps)                     | 0.32                        | *****                     |
| Han et al. (2020) (69)          | South Korea | 2 (8)                                    | 1 (6)                                     | 0                                            | COVID-19                | Confirmed             | No                                         | Yes (no)                                                         | Yes (NPS, OPS)                                      | 2.6 (V), 3.1 (S/Ps)                              | 0.08                        | *****                     |
| Han et al. (2020) (67)          | South Korea | 12 (27)                                  | 12 (27)                                   | 3 (7)                                        | COVID-19                | Confirmed             | No                                         | Yes (no)                                                         | Yes (NPS)                                           | 3.5 (V), 18.2 (P), 3.8 (S/Ps), 14.3 (As)         | 0.28                        | *****                     |
| Hung et al. (2020) (55)         | China       | 41 (310)                                 | 0                                         | 0                                            | COVID-19                | Confirmed             | No (control group)                         | No (no)                                                          | Yes (NPS, OPS, POS)                                 | 3.9 (V), 5.1 (A), 4.4 (S/Ps)                     | 3.18                        | *****                     |
| Hurst et al. (2020) (65)        | USA         | 133 (133)                                | 54 (54)                                   | 52 (52)                                      | COVID-19                | Confirmed             | No                                         | Yes (no)                                                         | Yes (NPS)                                           | 3.9 (V), 18.9 (P), 4.3 (S/Ps), 21.6 (As)         | 1.37                        | *****                     |
| Iwasaki et al. (2020) (56)      | Japan       | 5 (5)                                    | 0                                         | 0                                            | COVID-19                | Confirmed             | No                                         | Yes (no)                                                         | Yes (NPS)                                           | 2.6 (V), 3.4 (A), 3.1 (S/Ps)                     | 0.05                        | ***                       |
| Kawasuji et al. (2020) (70)     | Japan       | 16 (16)                                  | -                                         | -                                            | COVID-19                | Confirmed             | Yes (antivirals - type not reported)       | Yes (no)                                                         | Yes (NPS)                                           | 3.2 (V)                                          | 0.17                        | *****                     |
| L'Huilier et al. (2020) (66)    | Switzerland | 23 (23)                                  | 23 (23)                                   | 0                                            | COVID-19                | Confirmed             | No                                         | Yes (no)                                                         | Yes (NPS)                                           | 3.0 (V), 16.2 (P), 3.5 (S/Ps)                    | 0.24                        | *****                     |
| Lavezzo et al. (2020) (46)      | Italy       | 103 (110)                                | 2 (3)                                     | 49 (49)                                      | COVID-19                | Confirmed             | No                                         | Yes (yes)                                                        | Yes (NPS, OPS)                                      | 3.9 (V), 5.0 (A), 9.8 (P), 4.2 (S/Ps), 21.8 (As) | 1.13                        | *****                     |
| Lennon et al. (2020) (52)       | USA         | 2,200 (2,200)                            | 18 (18)                                   | 2,200 (2,200 <sup>#</sup> )                  | COVID-19                | Confirmed             | No                                         | No (yes)                                                         | Yes (NPS)                                           | 4.0 (V), 5.2 (A), 24.0 (As)                      | 22.60                       | *****                     |
| Lucas et al. (2020) (60)        | USA         | 24 (33)                                  | 0                                         | 0                                            | COVID-19                | Confirmed             | Moderate and severe patients (tocilizumab) | Yes (yes)                                                        | Yes (NPS)                                           | 3.6 (V), 4.7 (A), 4.1 (S/Ps)                     | 0.34                        | *****                     |
| Mitja et al. (2020) (62)        | Spain       | 148 (296)                                | 0                                         | 0                                            | COVID-19                | Confirmed             | No (control group)                         | No (no)                                                          | Yes (NPS)                                           | 3.9 (V), 5.1 (A), 4.4 (S/Ps)                     | 3.04                        | *****                     |

|                               |                 |            |        |       |          |           |                                                          |           |                            |                                         |      |       |
|-------------------------------|-----------------|------------|--------|-------|----------|-----------|----------------------------------------------------------|-----------|----------------------------|-----------------------------------------|------|-------|
| Pan et al. (2020) (68)        | China           | 75 (104)   | -      | 0     | COVID-19 | Confirmed | No                                                       | Yes (no)  | Yes (OPS)<br>No (Spu)      | 3.6 (V), 4.2 (S/Ps)                     | 1.07 | ****  |
| Peng et al. (2020) (47)       | China           | 6 (6)      | 0      | 0     | COVID-19 | Confirmed | Yes (arbidol, lopinavir, ritonavir)                      | Yes (no)  | Yes (OPS)                  | 3.1 (V), 4.1 (A), 3.6 (S/Ps)            | 0.06 | ***** |
| Perera et al. (2020) (57)     | China           | - (36)     | 0      | -     | COVID-19 | Confirmed | No                                                       | Yes (no)  | Yes (NPA, NPS, OPS, Spu)   | 3.3 (V), 4.3 (A)                        | 0.39 | ****  |
| Shi et al. (2020) (54)        | China           | 103 (103)  | 0      | 0     | COVID-19 | Confirmed | No                                                       | Yes (no)  | Yes (NPS, OPS)             | 4.0 (V), 5.2 (A), 4.4 (S/Ps)            | 1.06 | ****  |
| Shrestha et al. (2020) (53)   | USA             | 171 (171)  | 0      | 0     | COVID-19 | Confirmed | No                                                       | Yes (no)  | Yes (NPS)                  | 3.9 (V), 5.1 (A), 4.3 (S/Ps)            | 1.76 | ***** |
| To et al. (2020) (48)         | China           | 23 (51)    | 0      | 0     | COVID-19 | Confirmed | No                                                       | Yes (yes) | Yes (ETA, POS)             | 3.5 (V), 4.5 (A), 3.7 (S/Ps)            | 0.52 | ***** |
| van Kampen et al. (2020) (38) | The Netherlands | - (154)    | 0      | 0     | COVID-19 | Confirmed | No                                                       | Yes (yes) | Yes (NPS, Spu)             | 3.9 (V), 5.1 (A), 4.3 (S/Ps)            | 1.58 | ***** |
| Vetter et al. (2020) (63)     | Switzerland     | 5 (63)     | 0      | 0     | COVID-19 | Confirmed | No                                                       | Yes (yes) | Yes (NPS, OPS)             | 3.8 (V), 4.9 (A), 4.2 (S/Ps)            | 0.65 | ***** |
| Wölfel et al. (2020) (21)     | Germany         | 9 (136)    | 0      | 1 (4) | COVID-19 | Confirmed | No                                                       | Yes (yes) | Yes (NPS, OPS)<br>No (Spu) | 3.9 (V), 5.0 (A), 4.3 (S/Ps)            | 1.37 | ***** |
| Wyllie et al. (58)            | USA             | 40 (42)    | -      | 9 (9) | COVID-19 | Confirmed | No                                                       | Yes (yes) | Yes (NPS)                  | 3.7 (V), 4.8 (A), 4.0 (S/Ps), 18.3 (As) | 0.43 | ***** |
| Xu et al. (2020) (64)         | China           | 7 (14)     | 7 (14) | 1 (1) | COVID-19 | Confirmed | No                                                       | Yes (no)  | Yes (NPS)                  | 3.5 (V), 18.1 (P), 4.3 (S/Ps)           | 0.14 | ***** |
| Zhang et al. (2020) (45)      | China           | 9 (9)      | 0      | 0     | COVID-19 | Confirmed | No                                                       | Yes (no)  | Yes (NPS, OPS)             | 3.1 (V), 4.0 (A), 3.6 (S/Ps)            | 0.09 | ***** |
| Zheng et al. (2020) (51)      | China           | - (19)     | 0      | 0     | COVID-19 | Confirmed | No                                                       | Yes (no)  | Yes (POS, Spu)             | 3.8 (V), 4.9 (A), 4.1 (S/Ps)            | 0.20 | ***** |
| Zou et al. (2020) (49)        | China           | 14 (55)    | 0      | 1 (4) | COVID-19 | Confirmed | No                                                       | Yes (no)  | Yes (NPS, OPS)             | 3.7 (V), 4.9 (A), 3.6 (S/Ps)            | 0.57 | ***** |
| Chen et al. (2006) (72)       | China           | 154 (154#) | 0      | 0     | SARS     | Confirmed | Yes (oseltamivir, broad-spectrum antibiotics, ribavirin) | Yes (no)  | Yes (NPS)                  | 14.0 (V)                                | 1.57 | ***** |
| Chu et al. (2004) (73)*       | China           | 11 (11)    | 0      | 0     | SARS     | Confirmed | No (control group)                                       | Yes (yes) | Yes (NPS)                  | 8.6 (V)                                 | 0.11 | ***** |
| Chu et al. (2005) (75)        | China           | 57 (57)    | 0      | 0     | SARS     | Confirmed | No                                                       | Yes (yes) | Yes (NPA)                  | 13.3 (V)                                | 0.59 | ***** |
| Cheng et al. (2004) (77)      | China           | 59 (59)    | 0      | 0     | SARS     | Confirmed | Yes (ribavirin, hydrocortisone, prednisolone,            | Yes (yes) | Yes (NPA)                  | 13.4 (V)                                | 0.61 | ***** |

|                               |                |           |           |         |                        |           |                                                                                         |           |                     |          |      |       |
|-------------------------------|----------------|-----------|-----------|---------|------------------------|-----------|-----------------------------------------------------------------------------------------|-----------|---------------------|----------|------|-------|
| Hung et al. (2004) (76)       | China          | 60 (60)   | 0         | 0       | SARS                   | Confirmed | methylprednisolone<br>Yes (ribavirin, hydrocortisone, prednisolone, methylprednisolone) | No (yes)  | Yes (NPA)           | 13.5 (V) | 0.62 | ***** |
| Peiris et al. (2003) (78)*    | China          | 14 (42)   | 0         | 0       | SARS                   | Confirmed | Yes (ribavirin, hydrocortisone, prednisolone, methylprednisolone)                       | Yes (no)  | Yes (NPA)           | 13.4 (V) | 0.43 | ***** |
| Poon et al. (2003) (71)       | China          | 40 (40)   | 0         | 0       | SARS                   | Confirmed | No                                                                                      | No (yes)  | Yes (NPA)           | 11.3 (V) | 0.41 | ****  |
| Poon et al. (2004) (74)       | China          | - (43)    | 0         | 0       | SARS                   | Confirmed | -                                                                                       | No (yes)  | Yes (NPA)           | 12.5 (V) | 0.44 | ***** |
| Alves et al. (2020) (100)     | Brazil         | 86 (86)   | -         | 15 (15) | Influenza A(H1N1)pdm09 | Confirmed | No                                                                                      | No (yes)  | Yes (NPA, NPS, OPS) | 3.7 (V)  | 0.88 | ****  |
| Chan et al. (2011) (97)       | China          | 58 (58)   | 0         | 0       | Influenza A(H1N1)pdm09 | Confirmed | No (pretreatment)                                                                       | Yes (no)  | Yes (NPA, NPS, OPS) | 3.7 (V)  | 0.60 | ***** |
| Cheng et al. (2010) (101)     | China          | 60 (60)   | -         | 0       | Influenza A(H1N1)pdm09 | Confirmed | No (pretreatment)                                                                       | No (no)   | Yes (NPA)           | 3.7 (V)  | 0.62 | ***** |
| Cowling et al. (2010) (98)    | China          | 45 (54)   | 22 (31)   | 0       | Influenza A(H1N1)pdm09 | Confirmed | Yes (22 cases on oseltamivir)                                                           | Yes (yes) | Yes (NPS, OPS)      | 3.7 (V)  | 0.55 | ***** |
| Duchamp et al. (2010) (104)   | France         | 209 (209) | 209 (209) | 0       | Influenza A(H1N1)pdm09 | Confirmed | Yes (oseltamivir, zanamivir)                                                            | No (yes)  | Yes (NPS)           | 3.8 (V)  | 2.15 | ****  |
| Esposito et al. (2011) (95)   | Italy          | 74 (282)  | 74 (282)  | 0       | Influenza A(H1N1)pdm09 | Confirmed | No                                                                                      | Yes (yes) | Yes (NPS)           | 3.8 (V)  | 2.90 | ***** |
| Hung et al. (2010) (92)       | China          | 87 (87)   | -         | 0       | Influenza A(H1N1)pdm09 | Confirmed | Yes (oseltamivir)                                                                       | Yes (no)  | Yes (NPA, NPS)      | 3.8 (V)  | 0.89 | ***** |
| Ip et al. (2016) (83)         | China          | 17 (20)   | 7 (-)     | 0       | Influenza A(H1N1)pdm09 | Confirmed | No                                                                                      | Yes (no)  | Yes (NPS, OPS)      | 3.6 (V)  | 0.21 | ***** |
| Ito et al. (2012) (94)        | Japan          | 34 (34)   | -         | 0       | Influenza A(H1N1)pdm09 | Confirmed | No (pretreatment)                                                                       | Yes (yes) | Yes (NPS)           | 3.7 (V)  | 0.35 | ****  |
| Killingley et al. (2010) (89) | United Kingdom | 12 (21)   | -         | 0       | Influenza A(H1N1)pdm09 | Confirmed | Yes (oseltamivir)                                                                       | Yes (yes) | Yes (NPS)           | 3.5 (V)  | 0.22 | ***** |
| Launes et al. (2012) (88)     | Spain          | 47 (47)   | 47 (47)   | 0       | Influenza A(H1N1)pdm09 | Confirmed | No (pretreatment)                                                                       | No (no)   | Yes (NPA)           | 3.7 (V)  | 0.48 | ***** |
| Lee et al. (2011) (90)        | China          | 48 (48)   | 0         | 0       | Influenza A(H1N1)pdm09 | Confirmed | No (pretreatment)                                                                       | No (no)   | Yes (NPA)           | 3.7 (V)  | 0.49 | ***** |
| Lee et al. (2011) (96)        | Singapore      | 578 (578) | 231 (231) | 0       | Influenza A(H1N1)pdm09 | Confirmed | No (pretreatment)                                                                       | No (no)   | Yes (NPS)           | 3.8 (V)  | 5.94 | ***** |

|                                  |         |           |           |        |                        |           |                                        |           |                     |         |      |       |
|----------------------------------|---------|-----------|-----------|--------|------------------------|-----------|----------------------------------------|-----------|---------------------|---------|------|-------|
| Li et al. (2010) (81)            | China   | 581 (581) | 522 (522) | 0      | Influenza A(H1N1)pdm09 | Confirmed | No (pretreatment)                      | No (no)   | Yes (OPS)           | 3.8 (V) | 5.97 | ***** |
| Li et al. (2010) (97)            | China   | 27 (59)   | -         | 0      | Influenza A(H1N1)pdm09 | Confirmed | No (non-treated group)                 | No (no)   | Yes (NPA, NPS, OPS) | 3.7 (V) | 0.61 | ***** |
| Loeb et al. (2012) (79)          | Canada  | 97 (218)  | -         | - (17) | Influenza A(H1N1)pdm09 | Confirmed | No                                     | No (no)   | Yes (NPS)           | 3.8 (V) | 2.24 | ***** |
| Lu et al. (2012) (82)            | China   | 13 (25)   | -         | 0      | Influenza A(H1N1)pdm09 | Confirmed | Yes (oseltamivir, zanamivir)           | Yes (no)  | Yes (NPS)           | 3.5 (V) | 0.26 | ***** |
| Meschi et al. (2011) (86)        | Italy   | 533 (533) | 0         | 0      | Influenza A(H1N1)pdm09 | Confirmed | No (pretreatment)                      | No (no)   | Yes (NPS)           | 3.8 (V) | 5.48 | ***** |
| Ngaosuwankul et al. (2010) (102) | China   | 12 (33)   | -         | 0      | Influenza A(H1N1)pdm09 | Confirmed | No (pretreatment)                      | No (yes)  | Yes (NPA, NPS, OPS) | 3.6 (V) | 0.34 | ***** |
| Rath et al. (2012) (84)          | Germany | 27 (41)   | 27 (41)   | 0      | Influenza A(H1N1)pdm09 | Confirmed | Yes (oseltamivir)                      | Yes (yes) | Yes (NPS)           | 3.7 (V) | 0.42 | ***** |
| Suess et al. (2010) (80)         | Germany | 51 (129)  | 12 (-)    | 1 (1)  | Influenza A(H1N1)pdm09 | Confirmed | Yes (oseltamivir)                      | No (no)   | Yes (NPA, NPS, OPS) | 3.8 (V) | 1.33 | ***** |
| Thai et al. (2014) (93)          | Vietnam | 33 (123)  | 16 (-)    | 5 (28) | Influenza A(H1N1)pdm09 | Confirmed | Yes (oseltamivir)                      | Yes (yes) | Yes (NPS)           | 3.8 (V) | 1.26 | ***** |
| To et al. (2010) (99)            | China   | 22 (22)   | -         | 0      | Influenza A(H1N1)pdm09 | Confirmed | No (pretreatment)                      | No (no)   | Yes (NPA, NPS, OPS) | 3.4 (V) | 0.23 | ***** |
| To et al. (2010) (103)           | China   | 50 (50)   | 0         | 0      | Influenza A(H1N1)pdm09 | Confirmed | Yes (oseltamivir, nebulized zanamivir) | No (no)   | Yes (NPA, NPS)      | 3.6 (V) | 0.51 | ***** |
| Watanabe et al. (2011) (105)     | Japan   | 251 (251) | 251 (251) | 0      | Influenza A(H1N1)pdm09 | Confirmed | No (pretreatment)                      | No (yes)  | Yes (NPA)           | 3.8 (V) | 2.58 | ***** |
| Wu et al. (2012) (85)            | China   | 64 (89)   | -         | 0      | Influenza A(H1N1)pdm09 | Confirmed | Yes (oseltamivir)                      | No (yes)  | Yes (NPS)           | 3.7 (V) | 0.91 | ***** |
| Yang et al. (2011) (87)          | China   | 251 (251) | -         | 0      | Influenza A(H1N1)pdm09 | Confirmed | N/A                                    | No (yes)  | Yes (OPS)           | 3.8 (V) | 6.50 | ***** |

\*Data shown as “-” were not obtained from the paper or authors.

<sup>†</sup>Responses of “no” for pharmacotherapy are based on no pharmacotherapy given to the patients as described explicitly or none reported in the study.

<sup>‡</sup>For studies reporting specimen measurements as individual sample data (either in numerical or graphical formats), the sample data was extracted for analysis.

<sup>§</sup>Specimen measurements were converted to rVLs based on the dilution factor for specimens immersed in transport media.

<sup>||</sup>Abbreviations for random-effects meta-analyses: virus meta-analysis (V), adult subgroup (A), pediatric subgroup (P), symptomatic/presymptomatic subgroup (S/Ps), asymptomatic subgroup (As).

<sup>¶</sup>The hybrid JBI Critical Appraisal Checklist was used, with more stars indicating lower risk of bias. Studies were considered to have low risk of bias if they met the majority of the items (≥6/10 items). Results from each study are shown in Table S9.

<sup>#</sup>For these studies, 2,147 (Lennon et al.) and 134 (Chen et al.) individual specimen measurements were obtained for the individual sample datasets.

<sup>‡</sup>For Chu et al., only specimen measurements at 20 DFSO were collected, as 5-15 DFSO were specimens reported in Peiris et al.

**Table S7. Descriptive parameters for respiratory viral loads based on individual sample data.**

| Category                                             | Weibull distribution parameters |              | Respiratory viral load, log <sub>10</sub> copies/ml |                       |                            |                 |                                                   |                                                   |                                                   |
|------------------------------------------------------|---------------------------------|--------------|-----------------------------------------------------|-----------------------|----------------------------|-----------------|---------------------------------------------------|---------------------------------------------------|---------------------------------------------------|
|                                                      | n* (specimens)                  | n* (studies) | Scale factor (95% CI)                               | Shape factor (95% CI) | Mean (95% CI) <sup>†</sup> | SD <sup>†</sup> | 80 <sup>th</sup> percentile (95% CI) <sup>‡</sup> | 90 <sup>th</sup> percentile (95% CI) <sup>‡</sup> | 99 <sup>th</sup> percentile (95% CI) <sup>‡</sup> |
| SARS-CoV-2 (overall) <sup>§</sup>                    | 3,820                           | 25           | 7.01 (6.94-7.08)                                    | 3.47 (3.39-3.56)      | 6.29 (6.22-6.35)           | 2.04            | 8.04 (7.96-8.11)                                  | 8.91 (8.83-9.00)                                  | 10.88 (10.75-11.01)                               |
| SARS-CoV-1 (overall) <sup>§</sup>                    | 303                             | 5            | 6.37 (6.15-6.60)                                    | 3.40 (3.12-3.71)      | 5.72 (5.51-5.93)           | 1.86            | 7.33 (7.09-7.57)                                  | 8.14 (7.86-8.43)                                  | 9.98 (9.56-10.42)                                 |
| A(H1N1)pdm09 (overall) <sup>§</sup>                  | 512                             | 10           | 7.39 (7.27-7.51)                                    | 5.43 (5.07-5.81)      | 6.81 (6.69-6.94)           | 1.45            | 8.07 (7.94-8.20)                                  | 8.62 (8.47-8.76)                                  | 9.79 (9.59-10.00)                                 |
| SARS-CoV-2 (adult) <sup>§</sup>                      | 3,573                           | 19           | 7.00 (6.93-7.07)                                    | 3.47 (3.38-3.57)      | 6.27 (6.21-6.34)           | 2.04            | 7.99 (7.91-8.06)                                  | 8.88 (8.79-8.97)                                  | 11.01 (10.88-11.14)                               |
| SARS-CoV-2 (pediatric) <sup>§</sup>                  | 186                             | 8            | 7.46 (7.16-7.78)                                    | 3.64 (3.25-4.08)      | 6.72 (6.42-7.01)           | 2.06            | 8.50 (8.17-8.85)                                  | 9.38 (9.00-9.78)                                  | 11.34 (10.77-11.96)                               |
| SARS-CoV-2 (symptomatic/presymptomatic) <sup>§</sup> | 1,560                           | 21           | 7.41 (7.31-7.51)                                    | 3.81 (3.67-3.97)      | 6.68 (6.58-6.78)           | 2.01            | 8.39 (8.28-8.50)                                  | 9.22 (9.09-9.34)                                  | 11.05 (10.86-11.25)                               |
| SARS-CoV-2 (asymptomatic) <sup>§</sup>               | 2,221                           | 7            | 6.72 (6.63-6.81)                                    | 3.33 (3.22-3.44)      | 6.01 (5.92-6.09)           | 2.02            | 8.04 (7.96-8.11)                                  | 8.91 (8.83-9.00)                                  | 10.88 (10.75-11.01)                               |
| SARS-CoV-2 (all DFSO) <sup>§</sup>                   | 941                             | 20           | 7.04 (6.90-7.18)                                    | 3.47 (3.30-3.65)      | 6.32 (6.19-6.45)           | 2.04            | 8.10 (7.96-8.25)                                  | 8.95 (8.78-9.13)                                  | 10.93 (10.66-11.21)                               |
| SARS-CoV-2 (-3 DFSO) <sup>  </sup>                   | 1                               | 1            | -                                                   | -                     | 10.34                      | -               | -                                                 | -                                                 | -                                                 |
| SARS-CoV-2 (-2 DFSO) <sup>  </sup>                   | 3                               | 2            | -                                                   | -                     | 4.22 (2.41-6.02)           | 1.59            | -                                                 | -                                                 | -                                                 |
| SARS-CoV-2 (-1 DFSO)                                 | 15                              | 5            | 6.17 (5.11-7.47)                                    | 2.82 (1.89-4.19)      | 5.48 (4.25-6.70)           | 2.21            | 7.31 (6.11-8.75)                                  | 8.30 (6.88-10.02)                                 | 10.62 (8.38-13.45)                                |
| SARS-CoV-2 (0 DFSO)                                  | 48                              | 10           | 6.63 (6.08-7.23)                                    | 3.46 (2.81-4.26)      | 5.97 (5.43-6.51)           | 1.85            | 7.61 (7.01-8.25)                                  | 8.43 (7.75-9.18)                                  | 10.31 (9.29-11.43)                                |
| SARS-CoV-2 (1 DFSO)                                  | 59                              | 10           | 7.79 (7.23-8.40)                                    | 3.58 (2.91-4.40)      | 7.00 (6.43-7.58)           | 2.26            | 8.90 (8.28-9.56)                                  | 9.83 (9.12-10.61)                                 | 11.93 (10.84-13.14)                               |
| SARS-CoV-2 (2 DFSO) <sup>¶</sup>                     | 70                              | 14           | 7.40 (6.91-7.92)                                    | 3.60 (2.96-4.37)      | 6.65 (6.14-7.16)           | 2.17            | 8.44 (7.91-9.01)                                  | 9.32 (8.70-10.00)                                 | 11.31 (10.33-12.37)                               |
| SARS-CoV-2 (3 DFSO) <sup>¶</sup>                     | 73                              | 16           | 7.30 (6.79-7.85)                                    | 3.31 (2.74-4.00)      | 6.53 (6.01-7.06)           | 2.27            | 8.43 (7.86-9.04)                                  | 9.39 (8.73-10.11)                                 | 11.58 (10.53-12.73)                               |
| SARS-CoV-2 (4 DFSO) <sup>¶</sup>                     | 83                              | 16           | 6.86 (6.32-7.45)                                    | 2.75 (2.31-3.27)      | 6.09 (5.56-6.62)           | 2.46            | 8.16 (7.54-8.82)                                  | 9.29 (8.55-10.10)                                 | 11.96 (10.76-13.30)                               |
| SARS-CoV-2 (5 DFSO) <sup>¶</sup>                     | 92                              | 15           | 7.17 (6.70-7.67)                                    | 3.16 (2.69-3.72)      | 6.41 (5.95-6.88)           | 2.27            | 8.33 (7.81-8.89)                                  | 9.33 (8.72-10.00)                                 | 11.63 (10.66-12.69)                               |
| SARS-CoV-2 (6 DFSO) <sup>¶</sup>                     | 105                             | 15           | 6.84 (6.41-7.29)                                    | 3.13 (2.67-3.66)      | 6.10 (5.68-6.53)           | 2.23            | 7.96 (7.49-8.46)                                  | 8.93 (8.36-9.53)                                  | 11.14 (10.24-12.12)                               |
| SARS-CoV-2 (7 DFSO) <sup>¶</sup>                     | 133                             | 19           | 6.60 (6.23-6.98)                                    | 3.13 (2.73-3.59)      | 5.91 (5.55-6.27)           | 2.11            | 7.68 (7.27-8.11)                                  | 8.61 (8.13-9.12)                                  | 10.75 (9.98-11.58)                                |
| SARS-CoV-2 (8 DFSO) <sup>¶</sup>                     | 123                             | 19           | 6.51 (6.12-6.92)                                    | 3.03 (2.62-3.49)      | 5.82 (5.44-6.19)           | 2.13            | 7.62 (7.18-8.08)                                  | 8.58 (8.06-9.12)                                  | 10.78 (9.96-11.67)                                |
| SARS-CoV-2 (9 DFSO) <sup>¶</sup>                     | 128                             | 19           | 6.26 (5.87-6.67)                                    | 2.87 (2.50-3.29)      | 5.57 (5.20-5.94)           | 2.14            | 7.38 (6.95-7.85)                                  | 8.37 (7.85-8.92)                                  | 10.66 (9.83-11.55)                                |
| SARS-CoV-2 (10 DFSO) <sup>¶</sup>                    | 113                             | 17           | 5.76 (5.34-6.21)                                    | 2.58 (2.22-2.99)      | 5.13 (4.74-5.52)           | 2.13            | 6.92 (6.45-7.44)                                  | 7.96 (7.37-8.58)                                  | 10.41 (9.45-11.47)                                |

\*These two columns summarize the cumulative number of specimens (left) collected from the number of contributing studies (right) for each category in the systematic dataset.

†The mean and sample SD were calculated on the entirety of individual sample data for each category. These data were collected from studies clearly reporting data for individual specimens.

‡The Weibull quantile distributions were used to determine rVLs at the 80<sup>th</sup>, 90<sup>th</sup> and 99<sup>th</sup> cps.

§These categories included only rVL data from positive (above the detection limit) assay measurements.

||Data for earlier DFSO were excluded from distribution fitting based on limited data, and empty cells were marked with "-".

¶These categories included negative assay measurements (set at the detection limit to estimate rVLs; N = 4, 3, 7, 10, 13, 16, 14, 22 and 16 specimens for 2-10 DFSO, respectively) for cases that tested positive at an earlier DFSO.

**Table S8. Model parameters describing SARS-CoV-2 kinetics during respiratory infection.**

| Parameter | Description                                 | Value (95% CI)   | Units                                                        |
|-----------|---------------------------------------------|------------------|--------------------------------------------------------------|
| $\beta$   | Infection rate constant                     | 3.56 (2.51-4.61) | $\times 10^{-7}$ (copies/ml) <sup>-1</sup> day <sup>-1</sup> |
| $\rho$    | Cellular shedding rate of virus             | 1.83 (0.69-2.97) | copies/ml day <sup>-1</sup> cell <sup>-1</sup>               |
| $c$       | Clearance rate of virus                     | 6.28 (0.59-12.0) | day <sup>-1</sup>                                            |
| $\delta$  | Clearance rate of infected epithelial cells | 0.55 (0.30-0.79) | day <sup>-1</sup>                                            |
| $R_{0,c}$ | Cellular basic reproductive number          | 9.48             | unitless                                                     |
| $V_0^*$   | Initial rVL parameter                       | 4                | copies/ml                                                    |
| $I_0^*$   | Initial number of infected cells            | 0                | cells                                                        |
| $T_0^*$   | Initial number of uninfected cells          | $5 \times 10^7$  | cells                                                        |

\*Initial values were used as inputs for the numerical estimation of the model parameters.



**Table S9. Assessment of risk of bias based on the hybrid JBI critical appraisal checklist.**

| Study                     | Checklist items* |       |        |        |       |       |       |       |       |       |
|---------------------------|------------------|-------|--------|--------|-------|-------|-------|-------|-------|-------|
|                           | 1                | 2     | 3      | 4      | 5     | 6     | 7     | 8     | 9     | 10    |
| Argyropoulos et al. (61)  | Green            | Green | Green  | Green  | Red   | Green | Green | Red   | Green | Green |
| Baggio et al. (59)        | Green            | Green | Green  | Green  | Red   | Green | Green | Red   | Red   | Green |
| Fajnzylber et al. (50)    | Green            | Green | Green  | Green  | Green | Green | Green | Green | Green | Green |
| Han et al. (69)           | Red              | Green | Red    | Green  | Red   | Green | Green | Red   | Green | Green |
| Han et al. (67)           | Green            | Green | Green  | Green  | Red   | Green | Green | Red   | Green | Green |
| Hung et al. (55)          | Green            | Green | Red    | Green  | Red   | Green | Green | Red   | Green | Green |
| Hurst et al. (65)         | Green            | Green | Green  | Green  | Red   | Green | Green | Red   | Green | Green |
| Iwasaki et al. (56)       | Yellow           | Red   | Yellow | Yellow | Red   | Green | Green | Red   | Red   | Green |
| Kawasuji et al. (70)      | Green            | Green | Yellow | Green  | Red   | Green | Green | Red   | Red   | Green |
| L'Huillier et al. (66)    | Green            | Green | Green  | Green  | Red   | Green | Green | Red   | Green | Green |
| Lavezzo et al. (46)       | Green            | Green | Red    | Green  | Red   | Green | Green | Red   | Green | Green |
| Lennon et al. (52)        | Red              | Green | Green  | Green  | Red   | Green | Green | Red   | Green | Green |
| Lucas et al. (60)         | Green            | Green | Yellow | Yellow | Red   | Green | Green | Red   | Green | Green |
| Mitja et al. (62)         | Red              | Green | Green  | Green  | Red   | Green | Green | Red   | Green | Green |
| Pan et al. (68)           | Green            | Red   | Yellow | Yellow | Red   | Green | Green | Red   | Red   | Green |
| Peng et al. (47)          | Green            | Green | Green  | Green  | Red   | Green | Green | Red   | Green | Green |
| Perera et al. (57)        | Green            | Red   | Yellow | Green  | Red   | Green | Green | Red   | Red   | Green |
| Shi et al. (54)           | Green            | Green | Yellow | Yellow | Red   | Green | Green | Red   | Green | Green |
| Shrestha et al. (53)      | Red              | Green | Green  | Green  | Red   | Green | Green | Red   | Green | Green |
| To et al. (48)            | Green            | Green | Green  | Green  | Red   | Green | Green | Red   | Green | Green |
| van Kampen et al. (38)    | Green            | Green | Green  | Green  | Red   | Green | Green | Red   | Red   | Green |
| Vetter et al. (63)        | Green            | Green | Green  | Green  | Red   | Green | Green | Red   | Green | Green |
| Wölfel et al. (21)        | Green            | Green | Red    | Yellow | Red   | Green | Green | Red   | Green | Green |
| Wyllie et al. (58)        | Green            | Green | Yellow | Green  | Red   | Green | Green | Red   | Red   | Green |
| Xu et al. (64)            | Green            | Green | Green  | Green  | Red   | Green | Green | Red   | Green | Green |
| Zhang et al. (45)         | Green            | Green | Green  | Green  | Red   | Green | Green | Red   | Green | Green |
| Zheng et al. (51)         | Green            | Green | Green  | Green  | Red   | Green | Green | Red   | Red   | Green |
| Zou et al. (49)           | Green            | Green | Green  | Green  | Red   | Green | Green | Red   | Green | Green |
| Chen et al. (72)          | Green            | Green | Green  | Green  | Red   | Green | Green | Red   | Green | Green |
| Chu et al. (73)           | Green            | Green | Green  | Green  | Red   | Green | Green | Red   | Green | Green |
| Chu et al. (75)           | Green            | Green | Green  | Green  | Red   | Green | Green | Red   | Green | Green |
| Cheng et al. (77)         | Green            | Green | Green  | Green  | Red   | Green | Green | Red   | Green | Green |
| Hung et al. (76)          | Green            | Green | Yellow | Yellow | Red   | Green | Green | Red   | Green | Green |
| Peiris et al. (78)        | Green            | Green | Green  | Green  | Red   | Green | Green | Red   | Green | Green |
| Poon et al. (71)          | Green            | Red   | Yellow | Yellow | Red   | Green | Green | Red   | Red   | Green |
| Poon et al. (74)          | Green            | Red   | Yellow | Green  | Red   | Green | Green | Red   | Red   | Green |
| Alves et al. (100)        | Green            | Red   | Yellow | Yellow | Red   | Green | Green | Red   | Red   | Green |
| Chan et al. (91)          | Green            | Green | Yellow | Green  | Red   | Green | Green | Red   | Green | Green |
| Cheng et al. (101)        | Green            | Red   | Green  | Green  | Red   | Green | Green | Red   | Red   | Green |
| Cowling et al. (98)       | Green            | Green | Red    | Green  | Red   | Green | Green | Red   | Green | Green |
| Duchamp et al. (104)      | Green            | Green | Yellow | Yellow | Red   | Green | Green | Red   | Red   | Green |
| Esposito et al. (95)      | Green            | Green | Yellow | Yellow | Red   | Green | Green | Red   | Red   | Green |
| Hung et al. (92)          | Red              | Green | Green  | Green  | Red   | Green | Green | Red   | Green | Green |
| Ip et al. (83)            | Green            | Green | Red    | Yellow | Red   | Green | Green | Red   | Green | Green |
| Ito et al. (94)           | Green            | Red   | Yellow | Yellow | Red   | Green | Green | Red   | Red   | Green |
| Killingley et al. (89)    | Green            | Green | Green  | Green  | Red   | Green | Green | Red   | Green | Green |
| Launes et al. (88)        | Green            | Green | Green  | Green  | Red   | Green | Green | Red   | Green | Green |
| Lee et al. (90)           | Green            | Green | Yellow | Yellow | Red   | Green | Green | Red   | Red   | Green |
| Lee et al. (96)           | Green            | Green | Green  | Green  | Red   | Green | Green | Red   | Green | Green |
| Li et al. (81)            | Green            | Green | Yellow | Yellow | Red   | Green | Green | Red   | Red   | Green |
| Li et al. (97)            | Green            | Green | Green  | Green  | Red   | Green | Green | Red   | Red   | Green |
| Loeb et al. (79)          | Green            | Green | Green  | Green  | Red   | Green | Green | Red   | Red   | Green |
| Lu et al. (82)            | Green            | Green | Green  | Green  | Red   | Green | Green | Red   | Red   | Green |
| Meschi et al. (86)        | Green            | Green | Green  | Green  | Red   | Green | Green | Red   | Green | Green |
| Ngaosuwankul et al. (102) | Green            | Green | Yellow | Yellow | Red   | Green | Green | Red   | Red   | Green |
| Rath et al. (84)          | Green            | Green | Green  | Green  | Red   | Green | Green | Red   | Green | Green |
| Suess et al. (80)         | Green            | Green | Green  | Green  | Red   | Green | Green | Red   | Green | Green |
| Thai et al. (93)          | Green            | Green | Green  | Green  | Red   | Green | Green | Red   | Green | Green |
| To et al. (103)           | Green            | Green | Yellow | Yellow | Red   | Green | Green | Red   | Red   | Green |
| To et al. (99)            | Green            | Green | Green  | Green  | Red   | Green | Green | Red   | Red   | Green |
| Watanabe et al. (105)     | Green            | Green | Green  | Green  | Red   | Green | Green | Red   | Green | Green |
| Wu et al. (85)            | Green            | Green | Yellow | Yellow | Red   | Green | Green | Red   | Red   | Green |
| Yang et al. (87)          | Green            | Red   | Yellow | Yellow | Red   | Green | Green | Red   | Red   | Green |

\*Descriptions of each item are included in the hybrid JBI critical appraisal checklist (Table S10). Green, yellow and red represent yes, unclear and no, respectively.

**Table S10. Hybrid JBI critical appraisal checklist**

Reviewer \_\_\_\_\_ Date \_\_\_\_\_

Author \_\_\_\_\_ Year \_\_\_\_\_ Record Number \_\_\_\_\_

|                                                                                                                                                                           | Yes                      | No                       | Unclear                  | Not applicable           |
|---------------------------------------------------------------------------------------------------------------------------------------------------------------------------|--------------------------|--------------------------|--------------------------|--------------------------|
| 1. Was the sample frame appropriate to address the target population?                                                                                                     | <input type="checkbox"/> | <input type="checkbox"/> | <input type="checkbox"/> | <input type="checkbox"/> |
| 2. Were the study subjects and the setting described in detail?                                                                                                           | <input type="checkbox"/> | <input type="checkbox"/> | <input type="checkbox"/> | <input type="checkbox"/> |
| 3. Did the study have consecutive inclusion of participants for case series and cohort studies? Did the study use probability-based sampling for cross-sectional studies? | <input type="checkbox"/> | <input type="checkbox"/> | <input type="checkbox"/> | <input type="checkbox"/> |
| 4. Was the response rate adequate, and if not, was the low response rate managed appropriately?                                                                           | <input type="checkbox"/> | <input type="checkbox"/> | <input type="checkbox"/> | <input type="checkbox"/> |
| 5. Was the sample size adequate?                                                                                                                                          | <input type="checkbox"/> | <input type="checkbox"/> | <input type="checkbox"/> | <input type="checkbox"/> |
| 6. Were valid methods used for the identification of the condition?                                                                                                       | <input type="checkbox"/> | <input type="checkbox"/> | <input type="checkbox"/> | <input type="checkbox"/> |
| 7. Were standard, valid methods used for measurement of the exposure?                                                                                                     | <input type="checkbox"/> | <input type="checkbox"/> | <input type="checkbox"/> | <input type="checkbox"/> |
| 8. Was the exposure measured in an objective, reliable way for all participants?                                                                                          | <input type="checkbox"/> | <input type="checkbox"/> | <input type="checkbox"/> | <input type="checkbox"/> |
| 9. Was there clear reporting of clinical information of the participants?                                                                                                 | <input type="checkbox"/> | <input type="checkbox"/> | <input type="checkbox"/> | <input type="checkbox"/> |
| 10. Was statistical analysis appropriate?                                                                                                                                 | <input type="checkbox"/> | <input type="checkbox"/> | <input type="checkbox"/> | <input type="checkbox"/> |

Overall appraisal:    Include     Exclude     Seek further info

Comments (Including reason for exclusion)

---



---



---

## Tool Guidance

This hybrid checklist was based on the JBI Critical Appraisal Checklists for case series, prevalence studies and analytical cross-sectional studies.

**1. Was the sample frame appropriate to address the target population?**

This question relies upon knowledge of the broader characteristics of the population of interest and the geographical area.

This study broadly investigates the respiratory viral load for the diseases of interest. The population of interest is the general population infected with SARS-CoV-2, SARS-CoV-1, or A(H1N1)pdm09. The geographical area is not constrained. Sample frames restricted to particular subgroups within the general infected population were considered appropriate if they targeted one of the following groups analysed in our study: asymptomatic, presymptomatic, symptomatic, adult, pediatric, hospitalized, non-hospitalized, or community.

**2. Were the study subjects and the setting described in detail?**

Certain diseases or conditions vary in prevalence across different geographic regions and populations (e.g. Women vs. Men, sociodemographic variables between countries). The study sample should be described in sufficient detail so that other researchers can determine if it is comparable to the population of interest to them

**3. Did the study have consecutive inclusion of participants for case series and cohort studies? Did the study use probability sampling for cross-sectional studies?**

Inclusion of consecutive participants for case series and cohort studies yields results at lower risk of bias compared to other sampling methods for these study designs. Use of probability-based sampling methods for cross-sectional studies yields estimates at lower risk of bias compared to other sampling methods for this design. Studies that indicate a consecutive inclusion are more reliable than those that do not. For example, a case series that states ‘we included all patients (24) with osteosarcoma who presented to our clinic between March 2005 and June 2006’ is more reliable than a study that simply states ‘we report a case series of 24 people with osteosarcoma.’

**4. Was the response rate adequate, and if not, was the low response rate managed appropriately?**

A large number of dropouts, refusals or “not founds” amongst selected subjects may diminish a study’s validity, as can a low response rates for survey studies. The authors should clearly discuss the response rate and any reasons for non-response and compare persons in the study to those not in the study, particularly with regards to their socio-demographic characteristics. If reasons for non-response appear to be unrelated to the outcome measured and the characteristics of non-responders are

comparable to those who do respond in the study, the researchers may be able to justify a more modest response rate.

**5. Was the sample size adequate?**

The larger the sample, the narrower will be the confidence interval around the prevalence estimate, making the results more precise. An adequate sample size is important to ensure good precision of the final estimate. The sample size threshold was calculated as follows:

$$n^* = z^2 \sigma / d^2$$

where  $n^*$  is the sample size threshold,  $z$  is the z-score for the level of confidence (95%),  $\sigma$  is the standard deviation (assumed to be 3 log<sub>10</sub> copies/ml, a fourth of the full range of rVLs) and  $d$  is the marginal error (assumed to be 1 log<sub>10</sub> copies/ml, based on the minimum detection limit for qRT-PCR across studies). This item was met if  $\geq 75\%$  of the included DFSO had  $\geq 46$  specimen measurements.

**6. Were valid methods used for the identification of the condition?**

Many health problems are not easily diagnosed or defined and some measures may not be capable of including or excluding appropriate levels or stages of the health problem. If the outcomes were assessed based on existing definitions or diagnostic criteria, then the answer to this question is likely to be yes. If the outcomes were assessed using observer reported, or self-reported scales, the risk of over- or under-reporting is increased, and objectivity is compromised. Importantly, determine if the measurement tools used were validated instruments as this has a significant impact on outcome assessment validity.

**7. Were standard, valid methods used for measurement of the exposure?**

The study should clearly describe the method of measurement of exposure. Assessing validity requires that a 'gold standard' is available to which the measure can be compared. The validity of exposure measurement usually relates to whether a current measure is appropriate or whether a measure of past exposure is needed.

In this study, standard methods to measure viral load in respiratory specimens are RT-PCR quantifying via one of the standard genes for each virus.

**8. Was the exposure measured in an objective, reliable way for all participants?**

The study should clearly describe the procedural aspects of the measurement of exposure as well as factors that can contribute to heterogeneity in measurement.

In this study, objective, reliable interpretation of the exposure depends on the use of quantitative calibration; the specification of extraction; determination of the viral load as a standard metric (e.g., copies/ml or equivalent) or in a manner that can be converted to a standard metric; and, if present, specification of the amount of diluent (e.g., viral transport media) used.

**9. Was there clear reporting of clinical information of the participants?**

There should be clear reporting of clinical information of the participants such as the following information where relevant: disease status, comorbidities, stage of disease, previous interventions/treatment, results of diagnostic tests, etc.

In addition, there should be clear reporting of the number and types (asymptomatic, presymptomatic, symptomatic, adult, pediatric, hospitalized, non-hospitalized, community, etc.) of cases for measurements within the sampling periods of interest. For studies that include data outside of the infectious period, there should be clear reporting of clinical information for participants for the specimen measurements that were collected from within the infectious period.

**10. Was statistical analysis appropriate?**

As with any consideration of statistical analysis, consideration should be given to whether there was a more appropriate alternate statistical method that could have been used. The methods section of studies should be detailed enough for reviewers to identify which analytical techniques were used and whether these were suitable.

| <b>Risk of bias</b> |                                                                                                                                                                                                          |
|---------------------|----------------------------------------------------------------------------------------------------------------------------------------------------------------------------------------------------------|
| <b>Low</b>          | The majority of critical appraisal criteria are met ( $\geq 6/10$ items). The estimates are likely to be correct for the target population.                                                              |
| <b>High</b>         | The majority of critical appraisal criteria are not met ( $< 6/10$ items). This may impact on the validity and reliability of the estimates. The estimates may not be correct for the target population. |
| <b>Unclear</b>      | The majority of items are unclear. There was insufficient information to assess the risk of bias.                                                                                                        |
